# Supplementary material for: Genomic regions responsible for amenability to Agrobacterium-mediated transformation in barley
Source: PubMed Central journal article supplement (PMC5118740; doi:10.1038/srep37505), 2016-11-22
Supplement: srep37505-s1.pdf [file srep37505-s1.pdf]

## Supplementary data

**Title:** Genomic regions responsible for amenability to *Agrobacterium*-mediated transformation in barley

**Authors:** Hiroshi Hisano and Kazuhiro Sato

## Supplementary figure legends

Figure S1. Schematic overview of plant materials and methods in this study.

The F<sub>2</sub> generation of immature embryo derived from a cross between barley cvs. ‘Haruna Nijo’ and ‘Golden Promise’ was used for *Agrobacterium*-mediated transformation. The resultant transgenic barley plants were genotyped using SNP markers.

Figure S2. PCR analysis of 60 independent transgenic HN×GP plants.

PCR was performed using genomic DNA of transgenic HN×GP plants with specific primers for (A) *beta-glucuronidase* (*GUS*) and (B) *hygromycin phosphotransferase* (*HPT*). The expected sizes of PCR fragments were (A) 636 bp and (B) 375 bp, respectively. G, non-transgenic GP; H, non-transgenic HN; M, 100 bp ladder marker; P, plasmid positive control (pIG121-Hm); 1-60, Individual transgenic HN×GP plants.

Figure S3. Frequency of transgenic HN×GP plants classified by allele type at *TFA4*, *TFA7* and *TFA9*.

Transgenic HN×GP plants were grouped by the haplotype of *TFA4*, *TFA7* and *TFA9* and counted.

Figure S1

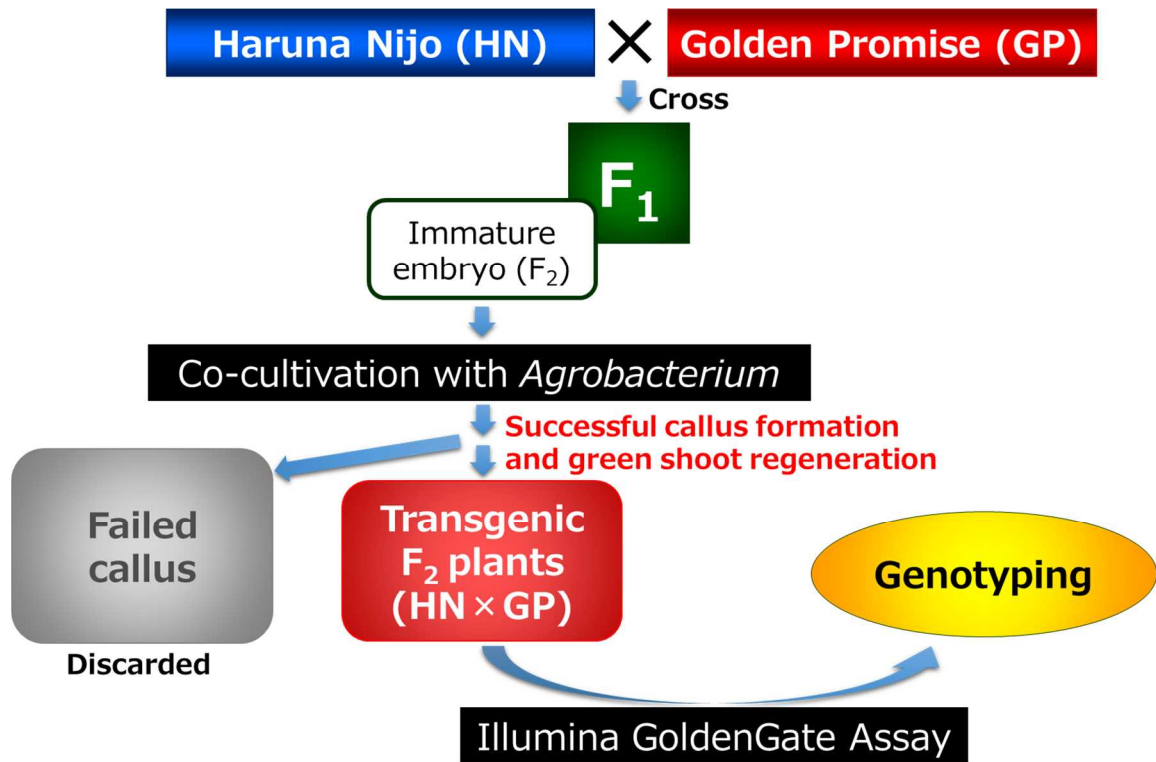

Figure S2

(A)

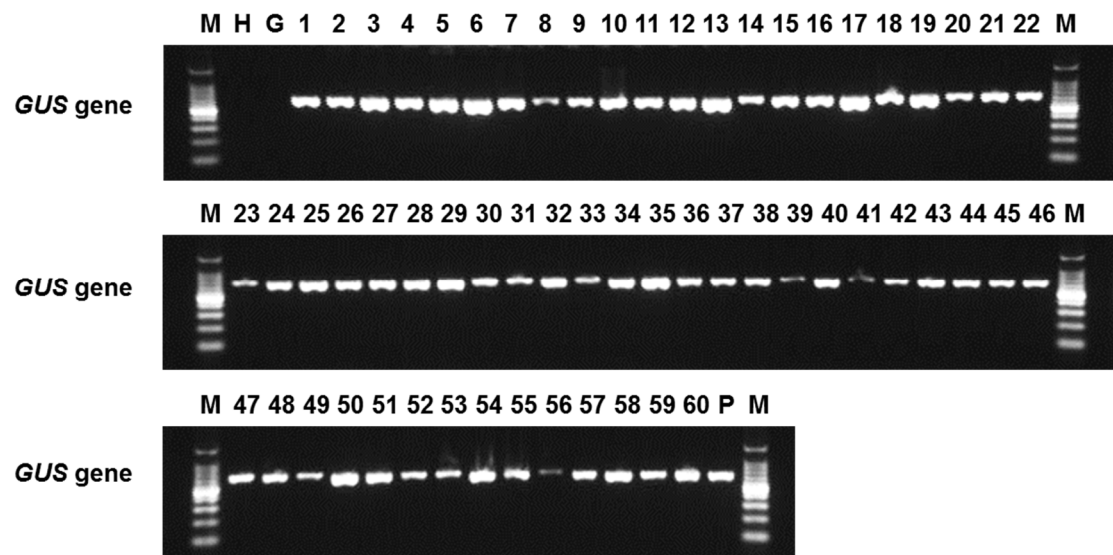

(B)

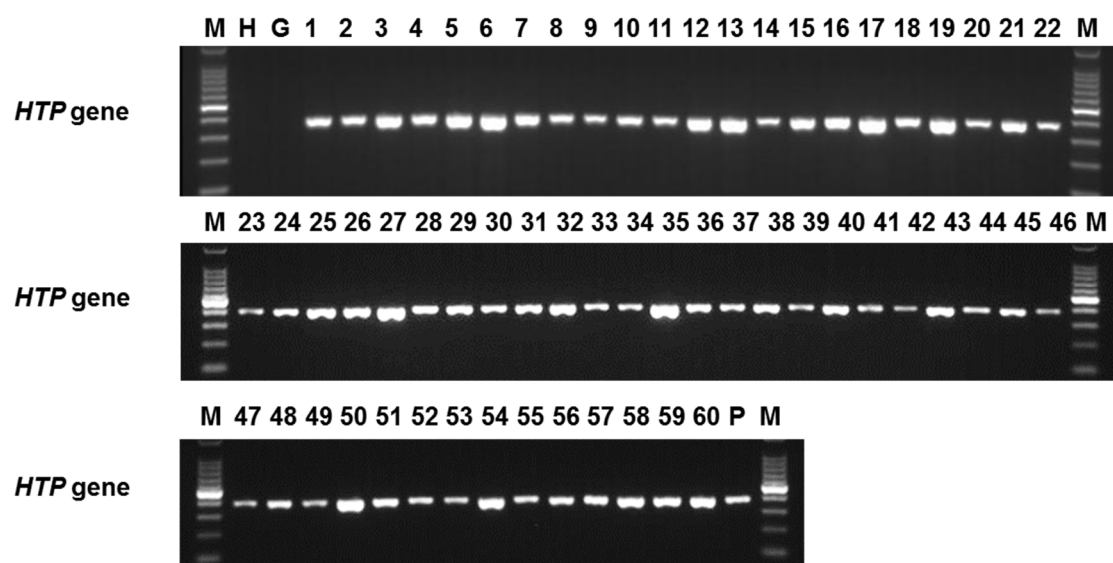

Figure S3

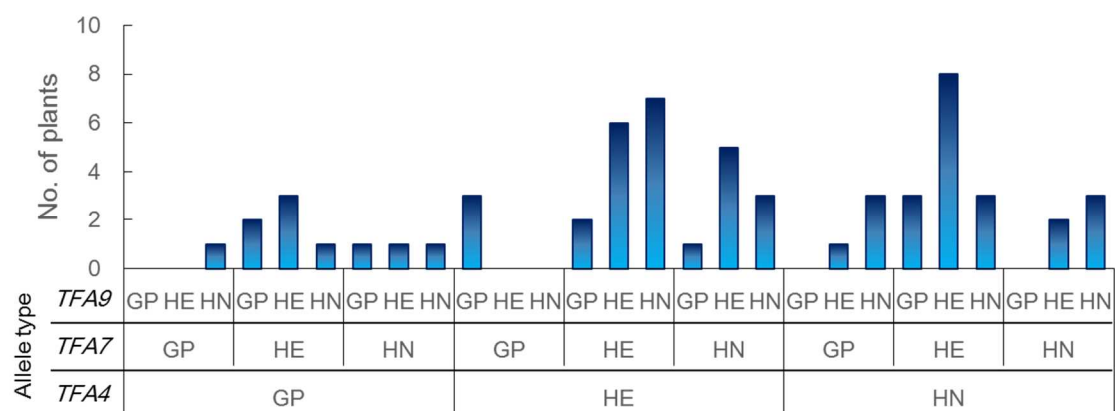

Original image of gel for Figure 3B

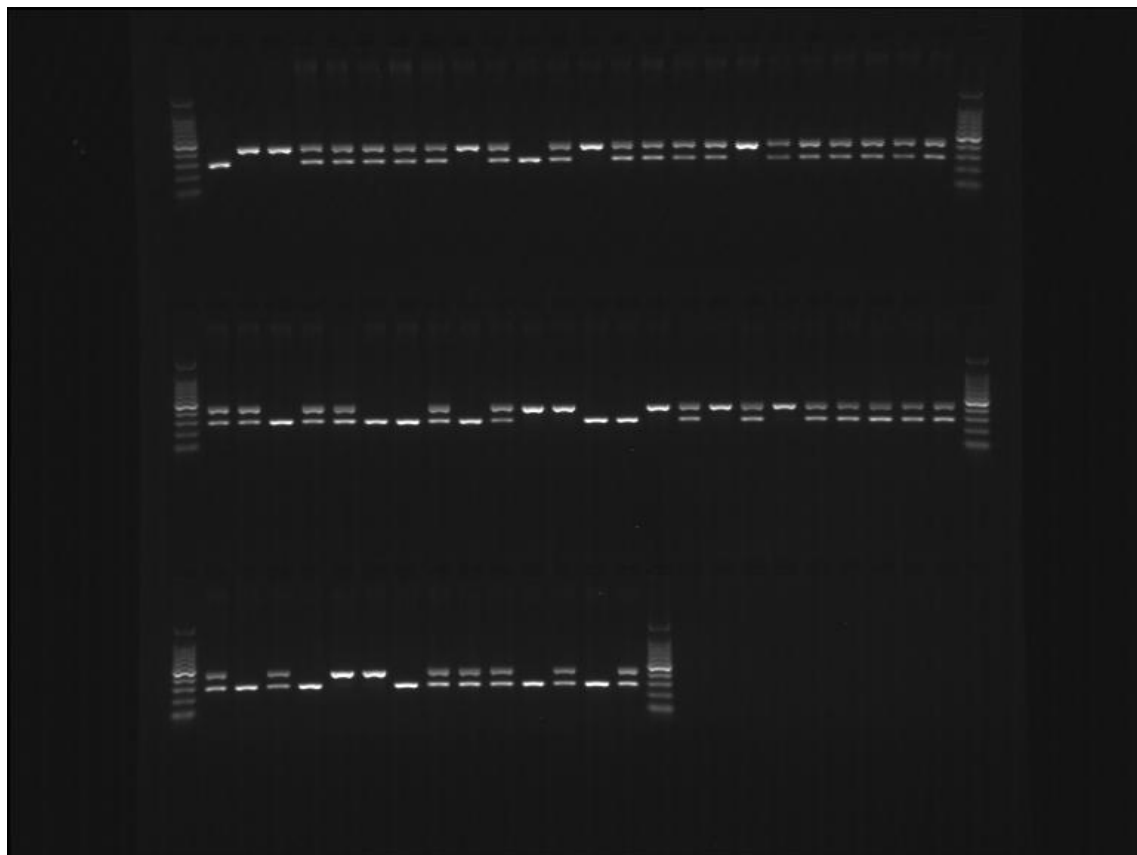

Table S1. Genotype of transgenic HN × GP plants, information of markers, and Chi-square values

| Index | Chr | position<br>(cM) | Name              | Address | HN × GP-01 | HN × GP-02 | HN × GP-03 | HN × GP-04 | HN × GP-05 | HN × GP-06 | HN × GP-07 | HN × GP-08 | HN × GP-09 | HN × GP-10 | HN × GP-11 | HN × GP-12 | HN × GP-13 | HN × GP-14 | HN × GP-15 | HN × GP-16 |
|-------|-----|------------------|-------------------|---------|------------|------------|------------|------------|------------|------------|------------|------------|------------|------------|------------|------------|------------|------------|------------|------------|
|       |     |                  |                   |         | het        | het        | het        | het        | het        | het        | het        | het        | het        | het        | het        | het        | het        | het        | het        | het        |
| 348   | 1H  | 0.95             | 337-641           | 5366    | het        | HN         | GP         | het        | HN         | het        | GP         | GP         | HN         | HN         | het        | GP         | HN         | GP         | HN         | het        |
| 164   | 1H  | 1.51             | 6195-2137         | 2205    | het        | HN         | GP         | het        | HN         | het        | GP         | GP         | HN         | HN         | het        | GP         | HN         | GP         | HN         | het        |
| 213   | 1H  | 23.86            | 1906-429          | 2915    | HN         | GP         | het        | het        | GP         | GP         | GP         | GP         | het        | HN         | HN         | GP         | HN         | het        | het        | HN         |
| 261   | 1H  | 26.58            | 6081-850          | 3901    | HN         | GP         | het        | het        | GP         | GP         | het        | GP         | het        | HN         | HN         | GP         | HN         | het        | het        | HN         |
| 183   | 1H  | 33.61            | 3751-1136         | 2398    | HN         | GP         | het        | het        | GP         | NC         | het        | het        | het        | HN         | HN         | het        | HN         | het        | het        | HN         |
| 292   | 1H  | 40.99            | 5381-1950         | 4075    | het        | GP         | het        | het        | GP         | GP         | het        | het        | het        | HN         | HN         | HN         | HN         | het        | het        | HN         |
| 316   | 1H  | 43.28            | 6720-641          | 5052    | het        | GP         | het        | het        | GP         | GP         | het        | het        | het        | HN         | HN         | HN         | HN         | het        | het        | HN         |
| 176   | 1H  | 54.73            | 7284-710          | 2322    | het        | GP         | het        | het        | GP         | GP         | het        | het        | het        | HN         | HN         | HN         | HN         | het        | het        | HN         |
| 152   | 1H  | 65.53            | 3675-2615         | 2059    | het        | GP         | het        | het        | het        | GP         | het        | het        | het        | HN         | HN         | HN         | HN         | het        | het        | HN         |
| 224   | 1H  | 99.19            | 3702-982          | 2999    | HN         | GP         | het        | HN         | HN         | GP         | HN         | het        | het        | HN         | HN         | HN         | HN         | HN         | het        | het        |
| 160   | 1H  | 106.60           | 3786-2204         | 2166    | HN         | GP         | het        | HN         | het        | het        | het        | het        | het        | HN         | het        | HN         | HN         | HN         | het        | het        |
| 105   | 1H  | 108.31           | 4962-1295         | 1601    | HN         | GP         | het        | HN         | het        | het        | het        | het        | het        | HN         | het        | HN         | HN         | HN         | het        | het        |
| 131   | 1H  | 112.54           | 5690-1045         | 1841    | HN         | GP         | het        | HN         | het        | het        | het        | het        | het        | HN         | het        | HN         | HN         | HN         | het        | het        |
| 265   | 1H  | 116.31           | 5048-1685         | 3919    | HN         | GP         | het        | HN         | het        | het        | het        | het        | het        | HN         | het        | HN         | HN         | HN         | het        | het        |
| 98    | 1H  | 125.27           | 4978-1030         | 1550    | HN         | GP         | het        | HN         | het        | het        | het        | het        | het        | het        | het        | HN         | het        | HN         | het        | het        |
| 379   | 1H  | 127.10           | 4393-1078         | 6110    | HN         | GP         | het        | HN         | het        | het        | het        | het        | het        | het        | het        | HN         | het        | HN         | het        | het        |
| 116   | 1H  | 131.89           | 5555-438          | 1711    | het        | het        | het        | HN         | het        | het        | het        | het        | het        | het        | GP         | HN         | het        | HN         | het        | GP         |
| 202   | 2H  | 10.94            | 3452-1355         | 2828    | het        | het        | het        | het        | HN         | HN         | HN         | het        | HN         | GP         | het        | het        | het        | het        | GP         | GP         |
| 201   | 2H  | 18.20            | 4277-1901         | 2808    | het        | HN         | het        | het        | HN         | HN         | het        | het        | HN         | GP         | het        | het        | het        | HN         | GP         | GP         |
| 110   | 2H  | 21.61            | 1865-396          | 1661    | het        | HN         | het        | het        | HN         | HN         | het        | het        | HN         | het        | het        | het        | het        | HN         | GP         | GP         |
| 296   | 2H  | 28.44            | 7747-1056         | 4107    | het        | HN         | het        | het        | het        | HN         | GP         | GP         | het        | het        | het        | HN         | het        | HN         | het        | GP         |
| 335   | 2H  | 29.15            | 7032-201          | 5221    | het        | HN         | het        | het        | het        | HN         | GP         | GP         | het        | het        | het        | HN         | het        | HN         | het        | GP         |
| 112   | 2H  | 37.32            | 1447-464          | 1682    | het        | HN         | HN         | het        | het        | het        | GP         | GP         | GP         | het        | het        | HN         | het        | HN         | HN         | het        |
| 358   | 2H  | 39.10            | 2964-382          | 5815    | het        | HN         | HN         | het        | het        | het        | GP         | GP         | GP         | het        | het        | HN         | het        | HN         | HN         | het        |
| 248   | 2H  | 41.66            | 4410-284          | 3606    | het        | HN         | HN         | het        | het        | het        | GP         | GP         | GP         | het        | het        | HN         | het        | HN         | HN         | het        |
| 102   | 2H  | 44.13            | 2651-1774         | 1588    | het        | HN         | HN         | het        | het        | het        | GP         | GP         | GP         | HN         | het        | HN         | het        | HN         | HN         | het        |
| 108   | 2H  | 54.95            | 2580-1456         | 1644    | HN         | HN         | HN         | het        | het        | het        | GP         | GP         | GP         | HN         | GP         | HN         | het        | HN         | HN         | het        |
| 66    | 2H  | 55.67            | 946-2500          | 1037    | HN         | HN         | HN         | het        | het        | het        | GP         | GP         | GP         | HN         | GP         | HN         | het        | HN         | HN         | het        |
| 199   | 2H  | 57.54            | 8889-842          | 2794    | HN         | HN         | HN         | het        | het        | het        | GP         | GP         | GP         | HN         | GP         | HN         | het        | HN         | HN         | het        |
| 194   | 2H  | 68.24            | 4434-804          | 2733    | HN         | HN         | HN         | het        | het        | het        | GP         | GP         | GP         | HN         | GP         | HN         | het        | HN         | HN         | het        |
| 3     | 2H  | 71.56            | 7187-382          | 33      | HN         | HN         | HN         | het        | het        | het        | GP         | GP         | GP         | HN         | GP         | HN         | het        | HN         | HN         | het        |
| 121   | 2H  | 73.04            | 334-1164          | 1772    | HN         | HN         | HN         | het        | het        | het        | GP         | GP         | GP         | HN         | GP         | HN         | het        | HN         | HN         | het        |
| 109   | 2H  | 75.18            | 4377-571          | 1647    | HN         | HN         | HN         | het        | het        | het        | GP         | GP         | GP         | HN         | GP         | HN         | het        | HN         | HN         | het        |
| 307   | 2H  | 78.03            | 1946-698          | 4950    | HN         | HN         | HN         | het        | het        | het        | GP         | het        | GP         | HN         | GP         | HN         | het        | HN         | HN         | het        |
| 132   | 2H  | 82.75            | 6117-1507         | 1850    | HN         | HN         | HN         | het        | het        | het        | GP         | het        | GP         | HN         | GP         | het        | het        | HN         | HN         | GP         |
| 354   | 2H  | 88.74            | 3469-1152         | 5784    | HN         | HN         | HN         | het        | het        | het        | GP         | het        | GP         | HN         | GP         | het        | het        | HN         | het        | GP         |
| 273   | 2H  | 90.10            | 8632-1809         | 3979    | HN         | HN         | HN         | het        | het        | het        | GP         | het        | GP         | HN         | GP         | het        | het        | HN         | het        | GP         |
| 195   | 2H  | 93.50            | 2020-539          | 2738    | HN         | HN         | HN         | het        | het        | het        | GP         | het        | GP         | HN         | GP         | het        | het        | HN         | het        | GP         |
| 217   | 2H  | 108.61           | ABC04580-1-4-420  | 2954    | GP         | het        | HN         | het        | het        | het        | GP         | het        | GP         | HN         | het        | GP         | het        | het        | GP         | het        |
| 129   | 2H  | 112.91           | 111-499           | 1826    | GP         | het        | het        | het        | het        | het        | GP         | GP         | GP         | HN         | het        | GP         | het        | het        | GP         | het        |
| 368   | 2H  | 115.08           | 3180-1771         | 5930    | GP         | het        | het        | het        | GP         | het        | GP         | GP         | GP         | HN         | het        | GP         | het        | het        | GP         | het        |
| 134   | 2H  | 117.91           | 7576-818          | 1876    | GP         | het        | het        | het        | GP         | het        | GP         | GP         | GP         | HN         | het        | GP         | GP         | het        | GP         | het        |
| 339   | 2H  | 120.80           | 3256-1196         | 5285    | GP         | het        | het        | het        | GP         | het        | GP         | GP         | GP         | HN         | HN         | GP         | GP         | het        | GP         | het        |
| 137   | 3H  | 6.03             | ConsensusGBS0194- | 1888    | HN         | HN         | het        | het        | het        | het        | HN         | het        | HN         | het        | GP         | GP         | het        | het        | GP         | HN         |
| 94    | 3H  | 8.86             | 5945-748          | 1382    | HN         | HN         | het        | het        | het        | het        | HN         | GP         | HN         | het        | GP         | GP         | het        | het        | GP         | HN         |
| 260   | 3H  | 46.31            | 4105-1417         | 3896    | het        | het        | GP         | het        | GP         | HN         | HN         | het        | het        | GP         | GP         | GP         | het        | GP         | het        | het        |
| 173   | 3H  | 59.89            | 1746-1527         | 2308    | het        | het        | GP         | het        | GP         | HN         | HN         | het        | het        | GP         | GP         | GP         | HN         | GP         | het        | het        |
| 10    | 3H  | 62.99            | 5038-1035         | 113     | het        | het        | GP         | het        | GP         | HN         | HN         | het        | het        | GP         | GP         | GP         | HN         | GP         | het        | het        |
| 67    | 3H  | 65.52            | 4184-393          | 1042    | het        | het        | GP         | het        | GP         | HN         | HN         | het        | het        | GP         | GP         | GP         | HN         | GP         | het        | het        |
| 302   | 3H  | 78.53            | 1176-1547         | 4161    | het        | HN         | GP         | het        | GP         | HN         | HN         | het        | het        | GP         | GP         | GP         | HN         | GP         | het        | het        |
| 36    | 3H  | 88.82            | 8020-87           | 634     | het        | HN         | GP         | het        | GP         | HN         | HN         | het        | het        | GP         | het        | GP         | het        | GP         | het        | het        |
| 243   | 3H  | 123.68           | 76-1059           | 3484    | het        | HN         | het        | het        | het        | HN         | HN         | GP         | het        | GP         | HN         | het        | het        | GP         | het        | het        |
| 29    | 3H  | 126.27           | 5260-462          | 515     | het        | HN         | het        | het        | het        | HN         | HN         | GP         | het        | GP         | HN         | het        | het        | GP         | het        | het        |
| 294   | 3H  | 130.19           | 2335-1614         | 4092    | het        | HN         | het        | GP         | het        | HN         | HN         | GP         | het        | GP         | HN         | het        | het        | GP         | het        | het        |
| 123   | 3H  | 131.59           | 3718-1026         | 1777    | het        | HN         | het        | GP         | het        | HN         | HN         | GP         | het        | GP         | HN         | het        | het        | GP         | het        | het        |
| 289   | 3H  | 150.37           | 7818-967          | 4069    | het        | het        | HN         | GP         | het        | het        | HN         | GP         | GP         | GP         | HN         | het        | het        | GP         | het        | GP         |
| 93    | 3H  | 155.09           | 13750-348         | 1375    | het        | het        | HN         | GP         | het        | het        | HN         | het        | GP         | GP         | het        | het        | het        | GP         | het        | GP         |
| 49    | 4H  | 5.55             | ABC14522-1-8-350  | 813     | het        | het        | het        | het        | het        | het        | het        | het        | het        | het        | HN         | HN         | het        | HN         | HN         | HN         |
| 170   | 4H  | 21.61            | 2055-947          | 2277    | het        | het        | GP         | het        | het        | GP         | het        | het        | HN         | het        | HN         | het        | het        | HN         | HN         | HN         |

|        |        |                    |      |     |     |     |     |     |     |     |     |     |     |     |     |     |     |     |     |
|--------|--------|--------------------|------|-----|-----|-----|-----|-----|-----|-----|-----|-----|-----|-----|-----|-----|-----|-----|-----|
| 233 4H | 77.31  | 9149-1316          | 3072 | het | GP  | GP  | GP  | het | het | het | het | HN  | het | HN  | het | HN  | het | HN  | het |
| 216 4H | 81.69  | 1523-1136          | 2934 | het | GP  | GP  | GP  | het | HN  | het | het | HN  | het | het | het | HN  | het | het | het |
| 77 4H  | 84.30  | 4986-1214          | 1225 | het | GP  | GP  | GP  | het | HN  | het | het | HN  | het | het | het | HN  | het | het | het |
| 175 4H | 87.49  | 4564-604           | 2320 | het | GP  | GP  | GP  | het | HN  | het | het | HN  | het | het | het | HN  | het | het | het |
| 240 4H | 92.38  | 4361-1867          | 3468 | GP  | GP  | het | GP  | het | HN  | het | het | het | het | het | het | HN  | HN  | het | het |
| 319 4H | 98.55  | 4535-1366          | 5073 | GP  | het | het | het | GP  | HN  | het | het | het | GP  | het | het | HN  | HN  | GP  | het |
| 43 4H  | 100.74 | 41-695             | 732  | GP  | het | het | het | GP  | HN  | het | het | het | GP  | het | het | HN  | HN  | GP  | het |
| 209 4H | 106.03 | 5692-310           | 2898 | GP  | het | het | het | GP  | HN  | het | het | het | GP  | GP  | het | HN  | HN  | GP  | het |
| 186 5H | 25.23  | 4753-1091          | 2420 | GP  | HN  | het | het | HN  | het | GP  | het | HN  | HN  | het | GP  | het | het | GP  | het |
| 20 5H  | 30.99  | 8377-1022          | 233  | GP  | HN  | het | het | HN  | het | GP  | het | HN  | HN  | het | het | het | het | GP  | het |
| 214 5H | 34.25  | 4684-775           | 2927 | GP  | HN  | het | het | HN  | het | GP  | het | HN  | HN  | het | het | het | het | GP  | het |
| 151 5H | 53.18  | 8320-955           | 2057 | GP  | HN  | het | het | HN  | GP  | het | het | HN  | het | het | het | het | het | GP  | het |
| 76 5H  | 70.48  | 264-571            | 1173 | GP  | HN  | het | het | HN  | GP  | het | het | HN  | HN  | het | HN  | het | het | GP  | het |
| 205 5H | 102.06 | 5004-375           | 2861 | HN  | HN  | het | het | HN  | HN  | het | GP  | GP  | HN  | het | HN  | het | GP  | het | het |
| 190 5H | 122.38 | 139-1263           | 2501 | HN  | GP  | GP  | HN  | GP  | het | het | het | het | HN  | het | HN  | het | het | het | HN  |
| 167 5H | 130.13 | 211-259            | 2232 | HN  | GP  | GP  | HN  | GP  | het | het | het | het | HN  | het | HN  | het | het | GP  | HN  |
| 263 5H | 135.72 | 5571-640           | 3908 | HN  | GP  | GP  | HN  | GP  | NC  | het | HN  | HN  | HN  | het | het | HN  | het | GP  | HN  |
| 222 5H | 137.16 | 1394-1222          | 2994 | HN  | HN  | het | GP  | HN  | GP  | het | het | HN  | HN  | het | het | HN  | het | GP  | HN  |
| 54 5H  | 147.40 | 3883-616           | 913  | HN  | GP  | GP  | HN  | GP  | het | het | HN  | HN  | HN  | HN  | het | HN  | het | GP  | HN  |
| 309 5H | 155.13 | ConsensusGBS0451-  | 4969 | HN  | GP  | GP  | HN  | het | GP  | GP  | HN  | HN  | HN  | HN  | het | HN  | het | GP  | HN  |
| 210 5H | 159.09 | 603-72             | 2901 | HN  | GP  | GP  | HN  | het | GP  | GP  | HN  | HN  | het | HN  | het | HN  | het | GP  | HN  |
| 278 5H | 171.66 | ABC09278-1-4-69    | 4004 | HN  | GP  | GP  | HN  | het | het | het | HN  | HN  | het | HN  | HN  | HN  | het | GP  | het |
| 223 5H | 191.97 | 2978-938           | 2995 | HN  | GP  | GP  | HN  | HN  | HN  | het | HN  | het | GP  | HN  | HN  | HN  | het | GP  | het |
| 57 5H  | 195.42 | 2726-852           | 950  | HN  | GP  | GP  | HN  | HN  | HN  | het | het | het | GP  | HN  | HN  | HN  | het | het | het |
| 200 6H | 0.00   | 1692-742           | 2807 | het | het | het | het | HN  | het | HN  | het | HN  | het | GP  | GP  | het | het | het | GP  |
| 46 6H  | 1.34   | 5159-579           | 753  | het | het | het | het | HN  | het | HN  | het | HN  | het | GP  | GP  | het | het | het | GP  |
| 212 6H | 3.11   | ConsensusGBS0136-  | 2913 | het | het | het | het | HN  | het | HN  | het | HN  | het | GP  | GP  | het | het | het | GP  |
| 189 6H | 12.54  | ConsensusGBS0346-  | 2485 | GP  | GP  | het | HN  | het | het | het | het | HN  | het | GP  | GP  | het | het | het | GP  |
| 187 6H | 16.97  | 1769-545           | 2442 | GP  | GP  | het | HN  | GP  | het | het | het | HN  | GP  | GP  | GP  | het | het | het | GP  |
| 120 6H | 28.39  | 4611-178           | 1753 | GP  | GP  | het | HN  | het | GP  | het | het | HN  | GP  | GP  | het | het | het | het | het |
| 37 6H  | 31.73  | 5771-91            | 651  | GP  | GP  | het | het | het | het | GP  | het | het | GP  | GP  | het | het | het | GP  | het |
| 118 6H | 48.74  | 3378-619           | 1746 | GP  | GP  | het | het | het | het | GP  | het | het | GP  | GP  | het | het | HN  | GP  | het |
| 117 6H | 52.75  | 1009-1089          | 1740 | GP  | GP  | het | het | het | het | GP  | het | het | GP  | GP  | het | het | HN  | GP  | het |
| 249 6H | 55.36  | 5232-2041          | 3625 | GP  | GP  | het | het | het | het | GP  | het | het | GP  | GP  | het | het | HN  | GP  | het |
| 305 6H | 63.27  | ConsensusGBS0369-  | 4908 | GP  | GP  | het | het | het | het | GP  | het | het | GP  | GP  | het | het | HN  | GP  | het |
| 333 6H | 64.36  | 3348-395           | 5184 | GP  | GP  | het | het | het | het | GP  | het | het | GP  | GP  | het | het | HN  | GP  | het |
| 352 6H | 67.04  | 4235-1617          | 5413 | GP  | GP  | het | het | het | het | GP  | het | het | GP  | GP  | het | het | HN  | GP  | het |
| 330 6H | 72.54  | 1096-1482          | 5157 | GP  | GP  | het | het | het | het | GP  | het | het | GP  | GP  | het | het | HN  | GP  | het |
| 282 6H | 77.89  | 7361-937           | 4022 | GP  | GP  | het | het | het | het | GP  | het | het | GP  | GP  | het | het | HN  | GP  | het |
| 295 6H | 81.17  | ConsensusGBS0239-! | 4099 | GP  | GP  | het | het | het | HN  | GP  | het | het | GP  | GP  | het | het | HN  | GP  | het |
| 124 6H | 105.60 | 428-1519           | 1784 | GP  | het | het | het | het | het | het | het | het | het | GP  | het | het | HN  | HN  | GP  |
| 181 6H | 110.32 | 2389-526           | 2361 | GP  | GP  | GP  | het | GP  | het | het | HN  | het | het | GP  | het | het | HN  | HN  | GP  |
| 372 6H | 119.02 | 1852-509           | 5985 | GP  | het | het | HN  | het | het | het | HN  | het | het | het | het | het | HN  | HN  | GP  |
| 90 6H  | 126.85 | 6523-1691          | 1333 | GP  | HN  | het | HN  | het | het | HN  | HN  | het | het | het | het | het | HN  | HN  | GP  |
| 18 6H  | 129.38 | 3363-1795          | 209  | GP  | HN  | het | HN  | het | het | HN  | HN  | GP  | het | het | GP  | het | het | HN  | GP  |
| 206 7H | 6.79   | 3359-1118          | 2862 | HN  | het | HN  | het | het | het | GP  | GP  | het | het | HN  | HN  | het | GP  | HN  | het |
| 172 7H | 9.84   | 2148-498           | 2298 | HN  | HN  | HN  | het | het | het | GP  | GP  | het | het | HN  | HN  | het | GP  | HN  | het |
| 140 7H | 17.20  | 9672-758           | 1935 | HN  | HN  | HN  | het | het | het | GP  | GP  | het | het | HN  | HN  | het | GP  | HN  | het |
| 55 7H  | 29.82  | 8365-454           | 915  | het | HN  | HN  | het | het | GP  | GP  | GP  | het | het | HN  | HN  | het | GP  | HN  | HN  |
| 381 7H | 31.75  | 1404-64            | 6123 | het | HN  | HN  | het | het | GP  | GP  | GP  | het | het | HN  | HN  | het | het | HN  | HN  |
| 15 7H  | 34.82  | 5777-354           | 162  | het | HN  | HN  | het | het | GP  | GP  | GP  | het | het | HN  | HN  | het | het | HN  | HN  |
| 321 7H | 46.19  | ConsensusGBS0356-  | 5076 | het | HN  | het | het | het | het | GP  | GP  | het | het | HN  | HN  | het | HN  | HN  | het |
| 1 7H   | 52.82  | 1792-372           | 10   | het | HN  | het | het | het | het | GP  | GP  | het | het | HN  | HN  | het | HN  | het | het |
| 114 7H | 56.81  | 12239-662          | 1689 | het | HN  | het | het | het | het | GP  | GP  | het | het | HN  | HN  | het | HN  | het | het |
| 81 7H  | 60.69  | 943-3107           | 1269 | het | het | het | het | GP  | het | GP  | GP  | het | het | HN  | HN  | het | HN  | het | het |
| 56 7H  | 63.66  | 11912-654          | 920  | het | HN  | het | het | GP  | het | GP  | GP  | het | het | HN  | het | het | HN  | het | het |
| 276 7H | 68.46  | 4475-478           | 3987 | het | HN  | het | het | het | het | GP  | GP  | het | het | HN  | het | het | HN  | het | het |
| 349 7H | 73.75  | 1735-1424          | 5381 | het | HN  | GN  | het | het | het | GP  | het | het | het | GP  | het | het | HN  | het | GP  |
| 148 7H | 78.22  | ABC09320-1-1-112   | 1990 | het | HN  | GP  | het | het | het | GP  | het | het | HN  | het | GP  | HN  | het | GP  | het |
| 58 7H  | 87.97  | 2462-971           | 952  | het | HN  | GP  | het | het | het | GP  | het | het | HN  | het | NC  | HN  | het | GP  | het |
| 182 7H | 98.50  | 977-1377           | 2369 | HN  | HN  | HN  | HN  | het | het | het | GP  | het | het | HN  | het | GP  | HN  | het | GP  |
| 31 7H  | 122.07 | ABC10197-1-1-101   | 585  | het | het | het | het | HN  | het | het | GP  | het | HN  | het | HN  | GP  | het | GP  | GP  |
| 5 7H   | 139.72 | 7023-448           | 54   | het | het | het | het | het | HN  | het | HN  | het | het | GP  | het | het | GP  | GP  | GP  |
| 13 7H  | 143.68 | 382-2624           | 153  | het | het | het | het | het | HN  | HN  | HN  | het | het | GP  | het | het | GP  | GP  | het |
| 113 7H | 144.45 | 8785-443           | 1688 | GP  | het | HN  | het | HN  | het | GP  | het | HN  | HN  | het | GP  | het | het | GP  | het |







| HN x GP-45 | HN x GP-46 | HN x GP-47 | HN x GP-48 | HN x GP-49 | HN x GP-50 | HN x GP-51 | HN x GP-52 | HN x GP-53 | HN x GP-54 | HN x GP-55 | HN x GP-56 | HN x GP-57 | HN x GP-58 | HN x GP-59 | HN x GP-60 | No. of HN | No. of GP | No. of het | $\chi^2$ value (1:2:1) | $\chi^2$ value (3:1, [GP+het]: [HN]) | $\chi^2$ value (3:1, [HN+het]: [GP]) |      |
|------------|------------|------------|------------|------------|------------|------------|------------|------------|------------|------------|------------|------------|------------|------------|------------|-----------|-----------|------------|------------------------|--------------------------------------|--------------------------------------|------|
| HN         | het        | HN         | GP         | het        | GP         | het        | GP         | het        | het        | het        | het        | het        | HN         | GP         | GP         | 18        | 17        | 25         | 1.70                   | 0.80                                 | 0.36                                 |      |
| HN         | het        | HN         | het        | het        | GP         | het        | GP         | het        | het        | het        | het        | het        | HN         | GP         | GP         | 18        | 16        | 26         | 1.20                   | 0.80                                 | 0.09                                 |      |
| HN         | HN         | het        | GP         | GP         | het        | het        | GP         | het        | HN         | GP         | HN         | het        | GP         | het        | het        | 17        | 17        | 26         | 1.07                   | 0.36                                 | 0.36                                 |      |
| HN         | HN         | het        | GP         | GP         | het        | het        | GP         | het        | HN         | GP         | HN         | het        | GP         | het        | het        | 17        | 16        | 27         | 0.63                   | 0.36                                 | 0.09                                 |      |
| HN         | HN         | het        | GP         | GP         | het        | het        | GP         | het        | HN         | GP         | HN         | het        | GP         | het        | het        | 17        | 12        | 30         | 0.86                   | 0.46                                 | 0.68                                 |      |
| HN         | HN         | het        | GP         | GP         | het        | HN         | GP         | het        | HN         | GP         | HN         | het        | GP         | het        | het        | 16        | 12        | 32         | 0.80                   | 0.09                                 | 0.80                                 |      |
| HN         | HN         | het        | GP         | GP         | het        | HN         | GP         | het        | HN         | GP         | HN         | het        | GP         | het        | het        | 16        | 11        | 33         | 1.43                   | 0.09                                 | 1.42                                 |      |
| HN         | HN         | het        | GP         | GP         | het        | HN         | GP         | het        | HN         | GP         | HN         | het        | GP         | het        | het        | 16        | 14        | 30         | 0.13                   | 0.09                                 | 0.09                                 |      |
| HN         | HN         | het        | GP         | GP         | het        | HN         | GP         | GP         | HN         | het        | het        | het        | GP         | het        | het        | 14        | 14        | 32         | 0.27                   | 0.09                                 | 0.09                                 |      |
| het        | HN         | het        | GP         | het        | het        | HN         | GP         | GP         | HN         | het        | het        | HN         | GP         | HN         | GP         | 20        | 17        | 23         | 3.57                   | 2.22                                 | 0.36                                 |      |
| het        | het        | het        | GP         | het        | het        | HN         | GP         | GP         | HN         | het        | het        | HN         | GP         | HN         | GP         | 16        | 14        | 30         | 0.13                   | 0.09                                 | 0.09                                 |      |
| het        | het        | het        | GP         | het        | het        | HN         | GP         | GP         | HN         | het        | het        | HN         | GP         | HN         | GP         | 16        | 14        | 30         | 0.13                   | 0.09                                 | 0.09                                 |      |
| het        | het        | het        | GP         | HN         | het        | HN         | GP         | GP         | HN         | het        | het        | HN         | GP         | HN         | GP         | 15        | 11        | 33         | 1.37                   | 0.01                                 | 1.27                                 |      |
| het        | het        | het        | GP         | HN         | het        | het        | GP         | GP         | HN         | het        | het        | HN         | GP         | het        | het        | 14        | 11        | 35         | 1.97                   | 0.09                                 | 1.42                                 |      |
| het        | GP         | het        | HN         | HN         | het        | GP         | GP         | het        | HN         | het        | het        | HN         | GP         | het        | HN         | 17        | 11        | 32         | 1.47                   | 0.36                                 | 1.42                                 |      |
| het        | GP         | het        | HN         | HN         | het        | GP         | GP         | het        | HN         | het        | het        | HN         | GP         | het        | HN         | 17        | 11        | 32         | 1.47                   | 0.36                                 | 1.42                                 |      |
| het        | GP         | het        | HN         | HN         | het        | GP         | het        | het        | HN         | GP         | het        | HN         | GP         | het        | HN         | 15        | 12        | 33         | 0.90                   | 0.00                                 | 0.80                                 |      |
| GP         | GP         | HN         | het        | het        | HN         | GP         | het        | het        | het        | GP         | het        | het        | GP         | het        | GP         | 14        | 16        | 30         | 0.13                   | 0.09                                 | 0.09                                 |      |
| GP         | GP         | HN         | het        | het        | HN         | GP         | het        | het        | het        | GP         | het        | het        | GP         | GP         | het        | GP        | 14        | 21         | 25                     | 3.30                                 | 0.09                                 | 3.20 |
| GP         | GP         | het        | het        | het        | HN         | het        | HN         | GP         | het        | het        | het        | GP         | GP         | het        | GP         | 12        | 22        | 26         | 4.40                   | 0.80                                 | 4.36                                 |      |
| GP         | GP         | het        | het        | het        | HN         | het        | HN         | GP         | HN         | het        | het        | GP         | GP         | het        | GP         | 12        | 22        | 26         | 4.40                   | 0.80                                 | 4.36                                 |      |
| GP         | GP         | het        | GP         | het        | HN         | het        | HN         | GP         | HN         | het        | het        | GP         | GP         | het        | GP         | 12        | 22        | 26         | 4.40                   | 0.80                                 | 4.36                                 |      |
| GP         | GP         | het        | GP         | het        | het        | HN         | het        | GP         | het        | het        | HN         | GP         | GP         | het        | GP         | 10        | 20        | 30         | 3.33                   | 2.22                                 | 2.22                                 |      |
| GP         | GP         | het        | GP         | het        | het        | HN         | het        | GP         | het        | het        | HN         | GP         | GP         | het        | GP         | 10        | 20        | 30         | 3.33                   | 2.22                                 | 2.22                                 |      |
| GP         | GP         | het        | GP         | het        | het        | HN         | het        | GP         | het        | het        | HN         | GP         | GP         | het        | GP         | 10        | 21        | 29         | 4.10                   | 2.22                                 | 3.20                                 |      |
| GP         | GP         | HN         | GP         | het        | het        | HN         | het        | GP         | het        | het        | HN         | GP         | GP         | het        | GP         | 12        | 21        | 27         | 3.30                   | 0.80                                 | 3.20                                 |      |
| GP         | GP         | HN         | GP         | het        | het        | HN         | GP         | GP         | het        | het        | HN         | GP         | GP         | het        | GP         | 13        | 25        | 22         | 9.07                   | 0.36                                 | 8.89                                 |      |
| GP         | GP         | HN         | GP         | het        | het        | HN         | GP         | GP         | het        | het        | HN         | GP         | GP         | het        | GP         | 13        | 25        | 22         | 9.07                   | 0.36                                 | 8.89                                 |      |
| GP         | GP         | HN         | GP         | het        | het        | HN         | GP         | GP         | het        | het        | HN         | GP         | GP         | het        | GP         | 13        | 25        | 22         | 9.07                   | 0.36                                 | 8.89                                 |      |
| GP         | GP         | HN         | GP         | het        | het        | HN         | GP         | GP         | het        | het        | HN         | GP         | GP         | het        | GP         | 13        | 25        | 22         | 9.07                   | 0.36                                 | 8.89                                 |      |
| GP         | GP         | HN         | GP         | het        | het        | HN         | GP         | GP         | het        | het        | HN         | GP         | GP         | het        | GP         | 13        | 25        | 22         | 9.07                   | 0.36                                 | 8.89                                 |      |
| GP         | GP         | het        | GP         | het        | het        | HN         | GP         | GP         | het        | het        | HN         | GP         | GP         | het        | GP         | 12        | 26        | 22         | 10.80                  | 0.80                                 | 10.76                                |      |
| GP         | GP         | GP         | GP         | het        | het        | HN         | GP         | GP         | het        | het        | HN         | GP         | GP         | het        | GP         | 12        | 26        | 22         | 10.80                  | 0.80                                 | 10.76                                |      |
| GP         | GP         | GP         | GP         | het        | het        | HN         | GP         | GP         | het        | GP         | HN         | GP         | GP         | het        | GP         | 11        | 31        | 18         | 22.93                  | 1.42                                 | 22.76                                |      |
| GP         | GP         | GP         | GP         | het        | het        | HN         | GP         | GP         | het        | GP         | HN         | GP         | GP         | HN         | het        | 13        | 29        | 18         | 18.13                  | 0.36                                 | 17.42                                |      |
| GP         | GP         | GP         | GP         | het        | het        | HN         | GP         | GP         | het        | GP         | HN         | GP         | GP         | HN         | het        | 13        | 28        | 19         | 15.57                  | 0.36                                 | 15.02                                |      |
| GP         | GP         | GP         | GP         | het        | het        | HN         | GP         | GP         | het        | GP         | HN         | GP         | GP         | HN         | het        | 13        | 29        | 18         | 18.13                  | 0.36                                 | 17.42                                |      |
| het        | GP         | GP         | het        | GP         | GP         | HN         | GP         | GP         | het        | GP         | het        | GP         | het        | het        | het        | 7         | 26        | 27         | 12.63                  | 5.69                                 | 10.76                                |      |
| het        | GP         | GP         | het        | GP         | GP         | HN         | GP         | GP         | het        | GP         | het        | het        | het        | het        | het        | 5         | 24        | 31         | 12.10                  | 8.89                                 | 7.20                                 |      |
| het        | GP         | GP         | het        | GP         | GP         | het        | GP         | GP         | het        | GP         | het        | het        | het        | het        | HN         | 5         | 25        | 30         | 13.33                  | 8.89                                 | 8.89                                 |      |
| het        | GP         | GP         | het        | GP         | GP         | het        | het        | GP         | het        | GP         | het        | het        | het        | het        | HN         | 4         | 24        | 32         | 13.60                  | 10.76                                | 7.20                                 |      |
| het        | GP         | GP         | het        | GP         | GP         | het        | het        | GP         | het        | GP         | het        | het        | het        | het        | HN         | 5         | 24        | 31         | 12.10                  | 8.89                                 | 7.20                                 |      |
| het        | HN         | het        | GP         | het        | GP         | het        | het        | GP         | GP         | het        | GP         | HN         | HN         | GP         | HN         | 21        | 12        | 27         | 3.30                   | 3.20                                 | 0.80                                 |      |
| GP         | HN         | het        | GP         | GP         | GP         | het        | het        | GP         | GP         | het        | GP         | het        | HN         | GP         | HN         | 20        | 14        | 26         | 2.27                   | 2.22                                 | 0.09                                 |      |
| GP         | GP         | HN         | GP         | GP         | GP         | GP         | GP         | GP         | GP         | GP         | GP         | GP         | het        | GP         | GP         | 4         | 39        | 17         | 52.10                  | 10.76                                | 51.20                                |      |
| GP         | GP         | HN         | GP         | GP         | GP         | GP         | GP         | GP         | GP         | GP         | GP         | GP         | het        | GP         | GP         | 5         | 39        | 16         | 51.60                  | 8.89                                 | 51.20                                |      |
| GP         | GP         | HN         | GP         | GP         | GP         | GP         | GP         | GP         | GP         | GP         | GP         | GP         | het        | GP         | GP         | 5         | 39        | 16         | 51.60                  | 8.89                                 | 51.20                                |      |
| GP         | GP         | HN         | GP         | GP         | GP         | GP         | GP         | GP         | GP         | GP         | GP         | GP         | het        | GP         | GP         | 5         | 39        | 16         | 51.60                  | 8.89                                 | 51.20                                |      |
| GP         | GP         | HN         | GP         | GP         | GP         | GP         | GP         | GP         | GP         | GP         | GP         | het        | GP         | GP         | GP         | 6         | 35        | 19         | 36.10                  | 7.20                                 | 35.56                                |      |
| GP         | GP         | het        | GP         | GP         | GP         | GP         | GP         | GP         | GP         | HN         | GP         | GP         | het        | GP         | GP         | 6         | 33        | 21         | 29.70                  | 7.20                                 | 28.80                                |      |
| GP         | het        | het        | GP         | het        | HN         | het        | het        | GP         | GP         | HN         | GP         | het        | HN         | het        | het        | 12        | 18        | 30         | 1.20                   | 0.80                                 | 0.80                                 |      |
| GP         | het        | het        | GP         | het        | HN         | het        | het        | GP         | GP         | het        | GP         | het        | HN         | het        | het        | 11        | 17        | 32         | 1.47                   | 1.42                                 | 0.36                                 |      |
| het        | het        | het        | GP         | HN         | HN         | het        | het        | GP         | GP         | het        | GP         | het        | HN         | het        | het        | 11        | 17        | 32         | 1.47                   | 1.42                                 | 0.36                                 |      |
| het        | het        | het        | GP         | HN         | HN         | het        | het        | GP         | GP         | het        | GP         | het        | HN         | het        | het        | 11        | 16        | 33         | 1.43                   | 1.42                                 | 0.09                                 |      |
| het        | het        | het        | GP         | GP         | HN         | HN         | het        | GP         | GP         | het        | het        | het        | HN         | GP         | het        | 11        | 22        | 27         | 4.63                   | 1.42                                 | 4.36                                 |      |
| het        | het        | het        | GP         | GP         | HN         | HN         | het        | GP         | GP         | het        | het        | het        | HN         | GP         | het        | 10        | 21        | 29         | 4.10                   | 2.22                                 | 3.20                                 |      |
| HN         | het        | het        | het        | HN         | het        | het        | het        | GP         | het        | het        | het        | het        | het        | het        | HN         | 16        | 7         | 37         | 5.97                   | 0.09                                 | 5.69                                 |      |
| HN         | GP         | het        | het        | het        | het        | het        | het        | GP         | HN         | het        | het        | het        | het        | het        | het        | 17        | 8         | 35         | 4.37                   | 0.36                                 | 4.36                                 |      |

|     |     |     |     |     |     |     |    |     |     |     |    |     |    |    |     |    |    |    |      |      |      |
|-----|-----|-----|-----|-----|-----|-----|----|-----|-----|-----|----|-----|----|----|-----|----|----|----|------|------|------|
| het | GP  | het | GP  | GP  | het | HN  | GP | het | het | het | GP | het | GP | GP | het | 13 | 18 | 29 | 0.90 | 0.36 | 0.80 |
| het | GP  | het | GP  | GP  | het | HN  | GP | het | het | het | GP | het | GP | GP | het | 10 | 16 | 34 | 2.27 | 2.22 | 0.09 |
| het | GP  | het | GP  | GP  | het | het | GP | het | GP  | het | GP | het | GP | GP | het | 8  | 17 | 35 | 4.37 | 4.36 | 0.36 |
| het | GP  | het | GP  | GP  | het | het | GP | het | GP  | het | GP | het | GP | GP | het | 7  | 16 | 37 | 5.97 | 5.69 | 0.09 |
| het | het | het | het | GP  | het | het | GP | het | GP  | HN  | GP | het | GP | GP | het | 9  | 14 | 37 | 4.10 | 3.20 | 0.09 |
| HN  | het | het | het | GP  | het | GP  | GP | het | GP  | HN  | GP | het | GP | GP | het | 9  | 19 | 32 | 3.60 | 3.20 | 1.42 |
| HN  | HN  | het | het | GP  | het | GP  | GP | het | GP  | HN  | GP | het | GP | GP | het | 10 | 19 | 31 | 2.77 | 2.22 | 1.42 |
| HN  | HN  | GP  | het | het | het | GP  | GP | het | GP  | HN  | GP | het | GP | GP | het | 11 | 21 | 28 | 3.60 | 1.42 | 3.20 |

|     |     |     |     |     |     |     |     |    |     |     |     |     |     |     |     |    |    |    |      |      |      |
|-----|-----|-----|-----|-----|-----|-----|-----|----|-----|-----|-----|-----|-----|-----|-----|----|----|----|------|------|------|
| het | het | het | het | HN  | HN  | GP  | het | GP | GP  | GP  | het | GP  | GP  | GP  | het | 22 | 14 | 24 | 4.53 | 4.36 | 0.09 |
| het | het | het | het | HN  | HN  | het | het | GP | GP  | HN  | het | het | GP  | GP  | het | 23 | 10 | 27 | 6.23 | 5.69 | 2.22 |
| het | het | het | het | HN  | HN  | het | het | GP | GP  | HN  | het | het | GP  | GP  | het | 23 | 10 | 27 | 6.23 | 5.69 | 2.22 |
| het | het | het | het | HN  | HN  | HN  | HN  | GP | het | HN  | het | het | GP  | GP  | het | 19 | 10 | 31 | 2.77 | 1.42 | 2.22 |
| het | het | GP  | het | HN  | HN  | HN  | HN  | GP | het | HN  | het | het | GP  | GP  | het | 19 | 11 | 30 | 2.13 | 1.42 | 1.42 |
| GP  | het | GP  | GP  | HN  | HN  | HN  | het | GP | het | het | het | het | GP  | GP  | GP  | 15 | 19 | 26 | 1.60 | 0.00 | 1.42 |
| GP  | GP  | het | HN  | HN  | het | HN  | het | HN | het | het | GP  | HN  | HN  | GP  | het | 18 | 14 | 28 | 0.80 | 0.80 | 0.09 |
| GP  | GP  | het | HN  | HN  | GP  | HN  | het | HN | het | het | GP  | het | HN  | GP  | het | 16 | 14 | 30 | 0.13 | 0.09 | 0.09 |
| GP  | GP  | het | HN  | HN  | GP  | HN  | het | HN | het | het | GP  | het | HN  | het | het | 17 | 13 | 29 | 0.56 | 0.46 | 0.28 |
| GP  | GP  | het | HN  | HN  | GP  | HN  | het | HN | het | het | GP  | het | HN  | het | het | 17 | 10 | 33 | 2.23 | 0.36 | 2.22 |
| GP  | GP  | het | het | HN  | GP  | HN  | het | HN | HN  | het | GP  | HN  | HN  | het | het | 19 | 11 | 28 | 2.28 | 1.86 | 1.13 |
| GP  | GP  | het | het | HN  | GP  | HN  | HN  | HN | HN  | het | GP  | HN  | het | het | het | 22 | 12 | 26 | 4.40 | 4.36 | 0.80 |
| GP  | GP  | het | het | HN  | GP  | HN  | HN  | HN | HN  | het | GP  | HN  | het | het | het | 20 | 12 | 28 | 2.40 | 2.22 | 0.80 |
| GP  | GP  | het | het | HN  | het | HN  | HN  | HN | HN  | GP  | HN  | HN  | het | het | het | 21 | 10 | 29 | 4.10 | 3.20 | 2.22 |
| het | het | HN  | HN  | het | het | HN  | het | HN | HN  | GP  | HN  | het | het | HN  | HN  | 21 | 9  | 30 | 4.80 | 3.20 | 3.20 |
| het | het | HN  | HN  | het | het | het | het | HN | HN  | GP  | HN  | het | het | HN  | HN  | 20 | 9  | 31 | 4.10 | 2.22 | 3.20 |

|     |     |     |     |     |     |     |    |     |     |     |     |     |     |     |     |    |    |    |      |      |      |
|-----|-----|-----|-----|-----|-----|-----|----|-----|-----|-----|-----|-----|-----|-----|-----|----|----|----|------|------|------|
| GP  | het | het | het | GP  | het | het | GP | het | GP  | GP  | het | HN  | het | het | het | 12 | 12 | 36 | 2.40 | 0.80 | 0.80 |
| GP  | het | het | het | GP  | GP  | het | GP | het | GP  | GP  | het | HN  | het | het | het | 12 | 13 | 35 | 1.70 | 0.80 | 0.36 |
| GP  | het | het | het | GP  | GP  | het | GP | het | GP  | GP  | het | HN  | het | het | het | 12 | 13 | 35 | 1.70 | 0.80 | 0.36 |
| GP  | GP  | het | het | het | GP  | het | GP | het | het | GP  | GP  | HN  | het | GP  | het | 8  | 18 | 34 | 4.40 | 4.36 | 0.80 |
| GP  | GP  | het | het | het | het | het | GP | het | HN  | GP  | GP  | HN  | het | GP  | GP  | 8  | 19 | 33 | 4.63 | 4.36 | 1.42 |
| het | het | het | HN  | HN  | het | het | GP | het | HN  | GP  | GP  | HN  | het | het | GP  | 14 | 15 | 31 | 0.10 | 0.09 | 0.00 |
| het | het | het | HN  | HN  | het | het | GP | het | HN  | het | GP  | HN  | het | het | GP  | 12 | 16 | 32 | 0.80 | 0.80 | 0.09 |
| HN  | het | het | HN  | HN  | het | het | GP | het | HN  | het | het | HN  | het | het | GP  | 13 | 14 | 33 | 0.63 | 0.36 | 0.09 |
| HN  | het | het | HN  | HN  | het | het | GP | het | HN  | het | het | HN  | het | het | GP  | 13 | 14 | 33 | 0.63 | 0.36 | 0.09 |
| HN  | het | het | HN  | HN  | het | het | GP | het | het | het | het | HN  | het | het | GP  | 12 | 14 | 34 | 1.20 | 0.80 | 0.09 |
| het | het | het | HN  | HN  | het | het | GP | het | het | het | het | HN  | het | het | GP  | 11 | 14 | 35 | 1.97 | 1.42 | 0.09 |
| het | het | het | HN  | HN  | het | het | GP | het | het | het | het | HN  | het | het | GP  | 11 | 16 | 33 | 1.43 | 1.42 | 0.09 |
| het | het | het | HN  | HN  | het | het | GP | het | het | het | het | HN  | het | HN  | GP  | 12 | 15 | 33 | 0.90 | 0.80 | 0.00 |
| het | het | het | HN  | HN  | het | het | GP | het | het | het | het | HN  | het | HN  | GP  | 11 | 14 | 35 | 1.97 | 1.42 | 0.09 |
| het | het | het | HN  | HN  | HN  | het | GP | het | het | het | het | HN  | het | HN  | GP  | 13 | 13 | 34 | 1.07 | 0.36 | 0.36 |
| het | GP  | het | HN  | het | HN  | GP  | GP | HN  | het | het | het | het | GP  | HN  | het | 16 | 14 | 30 | 0.13 | 0.09 | 0.09 |
| het | GP  | het | HN  | het | HN  | GP  | GP | het | het | het | het | het | het | HN  | het | 16 | 14 | 30 | 0.13 | 0.09 | 0.09 |
| GP  | GP  | het | HN  | het | HN  | het | GP | het | het | het | het | het | het | het | het | 16 | 10 | 34 | 2.27 | 0.09 | 2.22 |
| GP  | GP  | het | het | het | HN  | het | GP | het | het | het | GP  | het | het | het | het | 16 | 13 | 31 | 0.37 | 0.09 | 0.36 |
| GP  | GP  | GP  | GP  | GP  | HN  | het | GP | het | GP  | het | GP  | het | het | het | het | 14 | 19 | 27 | 1.43 | 0.09 | 1.42 |

|     |     |     |     |     |     |     |     |     |     |     |     |     |     |     |     |    |    |    |      |      |      |
|-----|-----|-----|-----|-----|-----|-----|-----|-----|-----|-----|-----|-----|-----|-----|-----|----|----|----|------|------|------|
| GP  | GP  | het | het | het | GP  | HN  | het | het | GP  | GP  | GP  | het | het | het | GP  | 12 | 19 | 29 | 1.70 | 0.80 | 1.42 |
| GP  | GP  | het | het | het | GP  | HN  | het | het | GP  | GP  | GP  | het | het | het | GP  | 13 | 18 | 29 | 0.90 | 0.36 | 0.80 |
| GP  | GP  | het | het | het | GP  | het | GP  | het | GP  | GP  | GP  | het | het | het | GP  | 12 | 21 | 27 | 3.30 | 0.80 | 3.20 |
| GP  | het | het | het | het | GP  | GP  | GP  | GP  | het | het | GP  | GP  | het | GP  | GP  | 13 | 21 | 26 | 3.20 | 0.36 | 3.20 |
| GP  | het | het | het | het | GP  | GP  | GP  | GP  | het | het | GP  | GP  | het | GP  | GP  | 13 | 19 | 28 | 1.47 | 0.36 | 1.42 |
| GP  | het | het | het | het | GP  | GP  | GP  | GP  | het | het | het | GP  | het | GP  | GP  | 13 | 17 | 30 | 0.53 | 0.36 | 0.36 |
| het | het | het | HN  | het | GP  | GP  | het | GP  | HN  | HN  | het | GP  | HN  | GP  | GP  | 18 | 18 | 24 | 2.40 | 0.80 | 0.80 |
| het | het | het | het | het | GP  | GP  | het | GP  | HN  | HN  | HN  | GP  | HN  | GP  | GP  | 18 | 14 | 28 | 0.80 | 0.80 | 0.09 |
| HN  | het | het | het | het | GP  | GP  | het | GP  | HN  | HN  | HN  | GP  | HN  | GP  | GP  | 19 | 14 | 27 | 1.43 | 1.42 | 0.09 |
| HN  | het | het | het | het | GP  | GP  | het | GP  | het | HN  | HN  | GP  | HN  | GP  | GP  | 18 | 15 | 27 | 0.90 | 0.80 | 0.00 |
| HN  | het | het | het | het | GP  | GP  | het | GP  | het | HN  | HN  | GP  | het | GP  | GP  | 16 | 12 | 32 | 0.80 | 0.09 | 0.80 |
| HN  | het | het | het | het | GP  | GP  | het | GP  | het | HN  | HN  | GP  | het | GP  | GP  | 16 | 12 | 32 | 0.80 | 0.09 | 0.80 |
| HN  | het | HN  | het | het | GP  | GP  | het | GP  | het | HN  | HN  | GP  | het | GP  | GP  | 17 | 12 | 31 | 0.90 | 0.36 | 0.80 |
| HN  | het | HN  | het | het | GP  | GP  | het | GP  | het | HN  | HN  | GP  | het | GP  | GP  | 16 | 14 | 30 | 0.13 | 0.09 | 0.09 |
| HN  | HN  | HN  | het | het | GP  | GP  | het | GP  | het | HN  | HN  | GP  | het | GP  | GP  | 18 | 13 | 28 | 1.00 | 0.95 | 0.28 |
| HN  | HN  | HN  | het | het | GP  | GP  | het | GP  | het | het | HN  | GP  | het | GP  | GP  | 21 | 14 | 25 | 3.30 | 3.20 | 0.09 |
| HN  | het | HN  | HN  | GP  | het | het | GP  | GP  | GP  | het | HN  | GP  | HN  | het | GP  | 14 | 16 | 30 | 0.13 | 0.09 | 0.09 |
| HN  | het | HN  | HN  | GP  | het | het | het | GP  | het | HN  | HN  | het | het | GP  | het | 15 | 13 | 32 | 0.40 | 0.00 | 0.36 |
| HN  | het | HN  | HN  | GP  | het | het | het | GP  | het | HN  | HN  | het | het | GP  | het | 16 | 12 | 32 | 0.80 | 0.09 | 0.80 |
| het | het | het | het | HN  | HN  | GP  | het | GP  | GP  | GP  | het | GP  | GP  | GP  | het | 21 | 14 | 25 | 3.30 | 3.20 | 0.09 |

Table S2. Genotypes of F10 recombinant inbred lines derived from a cross between Golden Promise and Haruna Nijo.

| Index | Chr | position (cM) | Name              | Address | F10HGP003 | F10HGP004 | F10HGP005 | F10HGP006 | F10HGP007 | F10HGP008 | F10HGP009 | F10HGP010 | F10HGP011 | F10HGP012 | F10HGP013 | F10HGP014 | F10HGP015 | F10HGP016 | F10HGP017 | F10HGP018 |
|-------|-----|---------------|-------------------|---------|-----------|-----------|-----------|-----------|-----------|-----------|-----------|-----------|-----------|-----------|-----------|-----------|-----------|-----------|-----------|-----------|
| 348   | 1H  | 0.95          | 337-641           | 5366    | GP        | HN        | HN        | HN        | HN        | GP        | GP        | GP        | GP        | GP        | HN        | GP        | GP        | GP        | HN        | GP        |
| 164   | 1H  | 1.51          | 6195-2137         | 2205    | GP        | HN        | HN        | HN        | HN        | GP        | GP        | GP        | GP        | GP        | HN        | GP        | GP        | GP        | HN        | GP        |
| 213   | 1H  | 23.86         | 1906-429          | 2915    | HN        | HN        | GP        | HN        | HN        | HN        | GP        | HN        | GP        | GP        | GP        | GP        | HN        | HN        | HN        | HN        |
| 261   | 1H  | 26.58         | 6081-850          | 3901    | HN        | HN        | GP        | HN        | HN        | HN        | GP        | HN        | GP        | GP        | GP        | HN        | HN        | HN        | HN        | HN        |
| 183   | 1H  | 33.61         | 3751-1136         | 2398    | HN        | HN        | GP        | HN        | HN        | HN        | HN        | HN        | GP        | GP        | GP        | HN        | HN        | HN        | HN        | HN        |
| 292   | 1H  | 40.99         | 5381-1950         | 4075    | HN        | HN        | GP        | GP        | HN        | HN        | HN        | HN        | GP        | GP        | GP        | HN        | HN        | HN        | HN        | HN        |
| 316   | 1H  | 43.28         | 6720-641          | 5052    | HN        | HN        | GP        | GP        | HN        | HN        | HN        | HN        | GP        | GP        | GP        | HN        | HN        | HN        | HN        | HN        |
| 176   | 1H  | 54.73         | 7284-710          | 2322    | HN        | HN        | GP        | GP        | HN        | HN        | HN        | HN        | GP        | GP        | GP        | HN        | HN        | GP        | HN        | HN        |
| 152   | 1H  | 65.53         | 3675-2615         | 2059    | HN        | HN        | GP        | GP        | HN        | HN        | HN        | HN        | GP        | GP        | GP        | HN        | HN        | GP        | HN        | HN        |
| 224   | 1H  | 99.19         | 3702-982          | 2999    | HN        | GP        | GP        | HN        | HN        | HN        | GP        | AB        | GP        | GP        | AB        | GP        | AB        | HN        | GP        | AB        |
| 160   | 1H  | 106.60        | 3786-2204         | 2166    | HN        | GP        | HN        | GP        | HN        | HN        | GP        | HN        | HN        | HN        | GP        | HN        | HN        | HN        | GP        | HN        |
| 105   | 1H  | 108.31        | 4962-1295         | 1601    | HN        | GP        | HN        | GP        | HN        | HN        | GP        | HN        | HN        | HN        | GP        | HN        | HN        | HN        | GP        | GP        |
| 131   | 1H  | 112.54        | 5690-1045         | 1841    | HN        | GP        | HN        | HN        | HN        | GP        | GP        | HN        | HN        | HN        | GP        | HN        | HN        | HN        | GP        | GP        |
| 265   | 1H  | 116.31        | 5048-1685         | 3919    | HN        | GP        | HN        | HN        | HN        | GP        | GP        | HN        | HN        | HN        | HN        | HN        | HN        | HN        | HN        | GP        |
| 98    | 1H  | 125.27        | 4978-1030         | 1550    | HN        | GP        | HN        | HN        | HN        | HN        | GP        | HN        | HN        | HN        | HN        | HN        | HN        | HN        | HN        | GP        |
| 379   | 1H  | 127.10        | 4393-1078         | 6110    | HN        | GP        | HN        | GP        | HN        | HN        | GP        | HN        | HN        | HN        | HN        | HN        | HN        | HN        | HN        | GP        |
| 116   | 1H  | 131.89        | 5555-438          | 1711    | HN        | HN        | HN        | GP        | HN        | HN        | GP        | HN        | HN        | HN        | HN        | HN        | HN        | HN        | HN        | GP        |
| 202   | 2H  | 10.94         | 3452-1355         | 2828    | GP        | GP        | HN        | HN        | HN        | HN        | GP        | GP        | GP        | GP        | GP        | HN        | HN        | HN        | GP        | GP        |
| 201   | 2H  | 18.20         | 4277-1901         | 2808    | GP        | GP        | HN        | HN        | HN        | HN        | GP        | GP        | GP        | GP        | GP        | HN        | HN        | HN        | GP        | GP        |
| 110   | 2H  | 21.61         | 1865-396          | 1661    | GP        | GP        | HN        | HN        | HN        | HN        | GP        | GP        | GP        | GP        | GP        | HN        | HN        | HN        | GP        | GP        |
| 296   | 2H  | 28.44         | 7747-1056         | 4107    | GP        | GP        | HN        | GP        | HN        | GP        | GP        | GP        | GP        | GP        | HN        | GP        | HN        | HN        | GP        | HN        |
| 335   | 2H  | 29.15         | 7032-201          | 5221    | GP        | GP        | HN        | GP        | HN        | GP        | GP        | GP        | GP        | GP        | HN        | GP        | HN        | HN        | GP        | HN        |
| 112   | 2H  | 37.32         | 1447-464          | 1682    | GP        | GP        | HN        | GP        | HN        | GP        | GP        | HN        | GP        | HN        | GP        | HN        | HN        | HN        | HN        | HN        |
| 358   | 2H  | 39.10         | 2964-382          | 5815    | GP        | GP        | HN        | GP        | HN        | GP        | GP        | HN        | GP        | HN        | GP        | GP        | HN        | HN        | HN        | HN        |
| 248   | 2H  | 41.66         | 4410-284          | 3606    | GP        | GP        | HN        | GP        | HN        | GP        | GP        | HN        | GP        | HN        | GP        | GP        | HN        | HN        | HN        | HN        |
| 102   | 2H  | 44.13         | 2651-1774         | 1588    | GP        | GP        | HN        | GP        | HN        | GP        | GP        | HN        | GP        | HN        | GP        | GP        | HN        | HN        | HN        | HN        |
| 108   | 2H  | 54.95         | 2580-1456         | 1644    | GP        | GP        | HN        | HN        | HN        | GP        | GP        | AB        | GP        | HN        | GP        | GP        | HN        | HN        | GP        | HN        |
| 66    | 2H  | 55.67         | 946-2500          | 1037    | GP        | GP        | HN        | HN        | HN        | GP        | GP        | HN        | GP        | HN        | GP        | GP        | HN        | HN        | GP        | HN        |
| 199   | 2H  | 57.54         | 8889-842          | 2794    | GP        | GP        | HN        | HN        | HN        | GP        | GP        | HN        | GP        | HN        | GP        | GP        | HN        | HN        | GP        | HN        |
| 194   | 2H  | 68.24         | 4434-804          | 2733    | GP        | GP        | HN        | HN        | HN        | GP        | GP        | HN        | GP        | GP        | GP        | GP        | HN        | HN        | GP        | HN        |
| 3     | 2H  | 71.56         | 7187-382          | 33      | GP        | GP        | HN        | HN        | HN        | GP        | GP        | HN        | GP        | GP        | GP        | GP        | HN        | HN        | GP        | HN        |
| 121   | 2H  | 73.04         | 334-1164          | 1772    | GP        | GP        | HN        | HN        | HN        | GP        | GP        | HN        | GP        | GP        | GP        | GP        | HN        | HN        | GP        | HN        |
| 109   | 2H  | 75.18         | 4377-571          | 1647    | GP        | GP        | HN        | HN        | HN        | GP        | AB        | HN        | GP        | GP        | GP        | GP        | HN        | HN        | GP        | HN        |
| 307   | 2H  | 78.03         | 1946-698          | 4950    | GP        | GP        | HN        | HN        | HN        | GP        | GP        | HN        | GP        | GP        | GP        | GP        | HN        | HN        | GP        | HN        |
| 132   | 2H  | 82.75         | 6117-1507         | 1850    | GP        | GP        | HN        | HN        | HN        | GP        | GP        | HN        | GP        | GP        | GP        | GP        | HN        | HN        | GP        | HN        |
| 354   | 2H  | 88.74         | 3469-1152         | 5784    | GP        | GP        | HN        | HN        | HN        | GP        | GP        | HN        | GP        | GP        | GP        | GP        | HN        | GP        | GP        | HN        |
| 273   | 2H  | 90.10         | 8632-1809         | 3979    | GP        | GP        | HN        | HN        | HN        | GP        | GP        | GP        | GP        | GP        | GP        | GP        | HN        | GP        | GP        | HN        |
| 195   | 2H  | 93.50         | 2020-539          | 2738    | GP        | GP        | HN        | HN        | HN        | GP        | GP        | HN        | GP        | GP        | GP        | HN        | HN        | GP        | HN        | HN        |
| 217   | 2H  | 108.61        | ABC04580-1-4-420  | 2954    | GP        | HN        | GP        | HN        | HN        | GP        | GP        | HN        | GP        | HN        | GP        | HN        | HN        | GP        | HN        | GP        |
| 129   | 2H  | 112.91        | 111-499           | 1826    | GP        | HN        | HN        | HN        | HN        | GP        | GP        | HN        | GP        | HN        | GP        | HN        | HN        | GP        | HN        | GP        |
| 368   | 2H  | 115.08        | 3180-1771         | 5930    | GP        | HN        | HN        | HN        | HN        | GP        | GP        | HN        | GP        | HN        | GP        | HN        | HN        | GP        | GP        | GP        |
| 134   | 2H  | 117.91        | 7576-818          | 1876    | GP        | HN        | HN        | HN        | HN        | GP        | GP        | GP        | GP        | HN        | GP        | HN        | HN        | GP        | GP        | GP        |
| 339   | 2H  | 120.80        | 3256-1196         | 5285    | GP        | HN        | HN        | HN        | HN        | GP        | GP        | GP        | GP        | HN        | GP        | HN        | HN        | GP        | GP        | GP        |
| 137   | 3H  | 6.03          | ConsensusGBS0194- | 1888    | GP        | HN        | GP        | GP        | HN        | GP        | GP        | HN        | GP        | HN        | HN        | HN        | GP        | HN        | HN        | HN        |
| 94    | 3H  | 8.86          | 5945-748          | 1382    | GP        | HN        | GP        | GP        | HN        | GP        | GP        | GP        | GP        | HN        | HN        | HN        | GP        | HN        | HN        | GP        |
| 260   | 3H  | 46.31         | 4105-1417         | 3896    | GP        | GP        | HN        | GP        | HN        | HN        | GP        | HN        | HN        | GP        | HN        | HN        | GP        | HN        | HN        | GP        |
| 173   | 3H  | 59.89         | 1746-1527         | 2308    | GP        | GP        | HN        | GP        | HN        | HN        | HN        | GP        | HN        | HN        | GP        | HN        | HN        | GP        | HN        | HN        |
| 10    | 3H  | 62.99         | 5038-1035         | 113     | GP        | GP        | HN        | GP        | HN        | HN        | HN        | GP        | HN        | HN        | GP        | HN        | HN        | GP        | HN        | HN        |
| 67    | 3H  | 65.52         | 4184-393          | 1042    | GP        | GP        | HN        | GP        | HN        | HN        | HN        | GP        | HN        | HN        | GP        | HN        | HN        | GP        | HN        | HN        |
| 302   | 3H  | 78.53         | 1176-1547         | 4161    | GP        | GP        | HN        | HN        | GP        | HN        | GP        | GP        | HN        | HN        | GP        | HN        | HN        | GP        | HN        | HN        |
| 36    | 3H  | 88.82         | 8020-87           | 634     | HN        | GP        | HN        | GP        | GP        | GP        | AB        | GP        | HN        | HN        | GP        | HN        | HN        | GP        | HN        | HN        |
| 243   | 3H  | 123.68        | 76-1059           | 3484    | HN        | GP        | HN        | HN        | GP        | HN        | HN        | GP        | HN        | HN        | HN        | HN        | GP        | GP        | HN        | HN        |
| 29    | 3H  | 126.27        | 5260-462          | 515     | HN        | GP        | HN        | HN        | GP        | GP        | HN        | GP        | GP        | HN        | HN        | HN        | GP        | GP        | HN        | HN        |
| 294   | 3H  | 130.19        | 2335-1614         | 4092    | HN        | GP        | HN        | HN        | GP        | GP        | HN        | GP        | GP        | HN        | HN        | HN        | GP        | GP        | HN        | HN        |
| 123   | 3H  | 131.59        | 3718-1026         | 1777    | HN        | GP        | GP        | HN        | GP        | GP        | GP        | HN        | HN        | HN        | HN        | HN        | GP        | GP        | GP        | HN        |
| 289   | 3H  | 150.37        | 7818-967          | 4069    | GP        | HN        | GP        | GP        | GP        | HN        | GP        | GP        | HN        | HN        | HN        | HN        | GP        | GP        | GP        | HN        |
| 93    | 3H  | 155.09        | 13750-348         | 1375    | GP        | HN        | GP        | GP        | GP        | HN        | NC        | GP        | HN        | HN        | HN        | HN        | GP        | HN        | GP        | HN        |
| 49    | 4H  | 5.55          | ABC14522-1-8-350  | 813     | GP        | HN        | GP        | HN        | HN        | HN        | HN        | GP        | HN        | HN        | HN        | GP        | HN        | GP        | GP        | HN        |

|        |        |                    |         |    |    |    |    |    |    |    |    |    |    |    |    |    |    |    |
|--------|--------|--------------------|---------|----|----|----|----|----|----|----|----|----|----|----|----|----|----|----|
| 170 4H | 21.61  | 2055-947           | 2277 GP | HN | GP | HN | HN | HN | HN | GP | HN | GP | HN | HN | GP | GP | HN | HN |
| 233 4H | 77.31  | 9149-1316          | 3072 HN | HN | GP | GP | GP | HN | HN | GP | HN | GP | HN | GP | GP | GP | HN | HN |
| 216 4H | 81.69  | 1523-1136          | 2934 HN | HN | GP | GP | GP | HN | HN | GP | HN | GP | HN | GP | GP | GP | HN | HN |
| 77 4H  | 84.30  | 4986-1214          | 1225 HN | HN | GP | GP | GP | HN | HN | GP | HN | GP | HN | GP | GP | GP | HN | HN |
| 175 4H | 87.49  | 4564-604           | 2320 HN | HN | GP | GP | GP | HN | HN | GP | HN | HN | HN | GP | GP | GP | HN | HN |
| 240 4H | 92.38  | 4361-1867          | 3468 HN | HN | GP | GP | GP | HN | HN | GP | HN | HN | HN | GP | GP | GP | HN | HN |
| 319 4H | 98.55  | 4535-1366          | 5073 HN | HN | GP | HN | GP | HN | HN | GP | GP | HN | HN | GP | GP | GP | HN | HN |
| 43 4H  | 100.74 | 41-695             | 732 HN  | HN | GP | HN | GP | HN | HN | GP | GP | HN | HN | GP | GP | GP | HN | HN |
| 209 4H | 106.03 | 5692-310           | 2898 HN | HN | GP | HN | GP | HN | HN | GP | GP | HN | HN | GP | HN | GP | GP | HN |
| 186 5H | 25.23  | 4753-1091          | 2420 GP | GP | GP | GP | HN | GP | HN | GP | HN | HN | GP | HN | HN | GP | HN | HN |
| 20 5H  | 30.99  | 8377-1022          | 233 GP  | GP | GP | GP | HN | GP | HN | GP | HN | HN | HN | HN | HN | GP | HN | HN |
| 214 5H | 34.25  | 4684-775           | 2927 GP | GP | GP | GP | HN | GP | HN | GP | HN | HN | HN | HN | HN | GP | HN | HN |
| 151 5H | 53.18  | 8320-955           | 2057 GP | GP | GP | HN | HN | GP | GP | GP | HN | HN | HN | HN | HN | GP | HN | GP |
| 76 5H  | 70.48  | 264-571            | 1173 GP | GP | GP | HN | HN | GP | GP | GP | HN | HN | HN | HN | HN | GP | HN | GP |
| 205 5H | 102.06 | 5004-375           | 2861 GP | GP | GP | GP | HN | GP | GP | GP | HN | HN | HN | HN | AB | GP | HN | NC |
| 190 5H | 122.38 | 139-1263           | 2501 HN | GP | HN | GP | HN | GP | AB | GP | GP | HN | HN | GP | HN | GP | HN | HN |
| 167 5H | 130.13 | 211-259            | 2232 HN | GP | HN | HN | HN | GP | AB | GP | HN | HN | HN | GP | HN | GP | HN | HN |
| 263 5H | 135.72 | 5571-640           | 3908 HN | GP | HN | HN | HN | HN | AB | GP | HN | HN | HN | GP | HN | GP | HN | HN |
| 222 5H | 137.16 | 1394-1222          | 2994 HN | GP | HN | HN | HN | HN | AB | GP | HN | HN | HN | GP | HN | GP | HN | HN |
| 54 5H  | 147.40 | 3883-616           | 913 HN  | GP | HN | HN | HN | HN | AB | NC | HN | HN | HN | GP | HN | GP | HN | HN |
| 309 5H | 155.13 | ConsensusGBS0451-  | 4969 HN | HN | HN | HN | HN | HN | GP | GP | HN | HN | HN | GP | GP | GP | GP | GP |
| 210 5H | 159.09 | 603-72             | 2901 HN | HN | HN | HN | HN | HN | GP | GP | HN | HN | HN | HN | GP | GP | GP | GP |
| 278 5H | 171.66 | ABC09278-1-4-69    | 4004 HN | HN | HN | HN | HN | HN | GP | HN | HN | HN | HN | HN | GP | GP | GP | GP |
| 223 5H | 191.97 | 2978-938           | 2995 HN | HN | GP | GP | GP | HN | GP | GP | GP | HN | GP | HN | GP | HN | GP | HN |
| 57 5H  | 195.42 | 2726-852           | 950 HN  | HN | GP | GP | GP | GP | GP | GP | GP | HN | GP | HN | GP | HN | GP | HN |
| 200 6H | 0.00   | 1692-742           | 2807 HN | GP | HN | HN | HN | GP | GP | HN | HN | HN | HN | HN | GP | GP | GP | GP |
| 46 6H  | 1.34   | 5159-579           | 753 HN  | GP | HN | HN | HN | GP | GP | HN | HN | HN | HN | HN | GP | GP | GP | GP |
| 212 6H | 3.11   | ConsensusGBS0136-  | 2913 HN | GP | HN | HN | HN | GP | GP | HN | HN | HN | HN | HN | GP | GP | GP | GP |
| 189 6H | 12.54  | ConsensusGBS0346-  | 2485 HN | HN | HN | HN | HN | GP | GP | HN | HN | GP | HN | HN | GP | GP | GP | GP |
| 187 6H | 16.97  | 1769-545           | 2442 HN | HN | HN | HN | HN | HN | HN | HN | HN | GP | GP | HN | GP | GP | GP | GP |
| 120 6H | 28.39  | 4611-178           | 1753 HN | HN | HN | HN | HN | GP | HN | HN | HN | GP | HN | HN | GP | HN | GP | GP |
| 37 6H  | 31.73  | 5771-91            | 651 HN  | HN | HN | HN | HN | GP | GP | HN | GP | HN | GP | HN | GP | HN | GP | GP |
| 118 6H | 48.74  | 3378-619           | 1746 HN | HN | HN | HN | HN | GP | GP | HN | GP | GP | GP | GP | HN | GP | HN | GP |
| 117 6H | 52.75  | 1009-1089          | 1740 HN | HN | HN | HN | HN | GP | GP | HN | GP | GP | GP | GP | HN | GP | HN | GP |
| 249 6H | 55.36  | 5232-2041          | 3625 HN | HN | HN | HN | HN | GP | GP | HN | GP | GP | GP | GP | HN | GP | HN | GP |
| 305 6H | 63.27  | ConsensusGBS0369-  | 4908 HN | HN | GP | HN | GP | GP | HN | GP | GP | GP | GP | GP | HN | GP | HN | GP |
| 333 6H | 64.36  | 3348-395           | 5184 HN | HN | GP | HN | GP | GP | HN | GP | GP | GP | GP | GP | HN | GP | HN | GP |
| 352 6H | 67.04  | 4235-1617          | 5413 HN | HN | GP | HN | GP | GP | HN | GP | GP | GP | GP | GP | HN | GP | HN | GP |
| 330 6H | 72.54  | 1096-1482          | 5157 HN | HN | GP | HN | GP | GP | HN | GP | GP | GP | GP | GP | HN | GP | HN | GP |
| 282 6H | 77.89  | 7361-937           | 4022 HN | HN | GP | HN | GP | GP | HN | GP | GP | GP | GP | GP | HN | GP | HN | GP |
| 295 6H | 81.17  | ConsensusGBS0239-! | 4099 HN | HN | GP | HN | GP | GP | HN | GP | GP | GP | GP | GP | HN | GP | HN | GP |
| 124 6H | 105.60 | 428-1519           | 1784 HN | GP | HN | HN | GP | HN | HN | GP | GP | GP | GP | GP | HN | GP | HN | GP |
| 181 6H | 110.32 | 2389-526           | 2361 HN | GP | GP | HN | GP | HN | GP | GP | GP | GP | GP | GP | HN | GP | HN | GP |
| 372 6H | 119.02 | 1852-509           | 5985 HN | GP | HN | HN | GP | HN | HN | GP | GP | GP | GP | GP | HN | GP | HN | GP |
| 90 6H  | 126.85 | 6523-1691          | 1333 HN | GP | HN | HN | GP | HN | HN | GP | GP | GP | HN | HN | GP | HN | GP | GP |
| 18 6H  | 129.38 | 3363-1795          | 209 HN  | GP | HN | HN | HN | HN | HN | GP | GP | GP | HN | HN | GP | HN | HN | HN |
| 206 7H | 6.79   | 3359-1118          | 2862 HN | HN | HN | HN | HN | GP | GP | GP | HN | GP | HN | HN | GP | GP | HN | HN |
| 172 7H | 9.84   | 2148-498           | 2298 HN | HN | HN | HN | HN | GP | GP | GP | HN | GP | HN | HN | GP | GP | HN | HN |
| 140 7H | 17.20  | 9672-758           | 1935 GP | HN | HN | HN | HN | HN | GP | AB | HN | HN | HN | HN | GP | GP | HN | HN |
| 55 7H  | 29.82  | 8365-454           | 915 HN  | HN | GP | HN | GP | HN | GP | GP | HN | HN | HN | HN | GP | HN | HN | HN |
| 381 7H | 31.75  | 1404-64            | 6123 HN | HN | GP | HN | GP | HN | GP | GP | HN | HN | HN | HN | HN | HN | HN | HN |
| 15 7H  | 34.82  | 5777-354           | 162 HN  | HN | HN | HN | GP | HN | GP | GP | HN | HN | HN | HN | HN | HN | HN | HN |
| 321 7H | 46.19  | ConsensusGBS0356-  | 5076 HN | HN | HN | GP | GP | GP | HN | GP | HN | HN | HN | HN | HN | GP | HN | HN |
| 1 7H   | 52.82  | 1792-372           | 10 HN   | HN | GP | HN | GP | GP | GP | GP | HN | HN | HN | HN | HN | GP | HN | HN |
| 114 7H | 56.81  | 12239-662          | 1689 GP | HN | GP | HN | GP | GP | HN | GP | HN | HN | HN | HN | HN | GP | HN | HN |
| 81 7H  | 60.69  | 943-3107           | 1269 HN | HN | GP | HN | GP | GP | HN | GP | HN | HN | HN | HN | HN | GP | HN | HN |
| 56 7H  | 63.66  | 11912-654          | 920 HN  | HN | GP | HN | GP | GP | HN | HN | HN | HN | HN | HN | HN | GP | HN | HN |
| 276 7H | 68.46  | 4475-478           | 3987 HN | HN | GP | HN | GP | GP | HN | HN | HN | HN | HN | HN | HN | HN | GP | HN |
| 349 7H | 73.75  | 1735-1424          | 5381 HN | HN | GP | HN | GP | HN | HN | HN | HN | HN | HN | HN | HN | HN | GP | HN |
| 148 7H | 78.22  | ABC09320-1-1-112   | 1990 HN | HN | GP | HN | GP | HN | HN | HN | HN | HN | HN | HN | HN | HN | GP | HN |
| 58 7H  | 87.97  | 2462-971           | 952 HN  | HN | GP | HN | GP | HN | HN | HN | HN | HN | HN | HN | HN | HN | GP | HN |
| 182 7H | 98.50  | 977-1377           | 2369 HN | GP | GP | HN | GP | HN | HN | GP | HN | HN | HN | HN | HN | GP | HN | HN |
| 31 7H  | 122.07 | ABC10197-1-1-101   | 585 HN  | HN | HN | HN | HN | HN | HN | GP | GP | HN | GP | HN | GP | GP | HN | HN |
| 5 7H   | 139.72 | 7023-448           | 54 GP   | HN | GP | HN | HN | HN | GP | GP | GP | HN | GP | GP | HN | GP | HN | HN |
| 13 7H  | 143.68 | 382-2624           | 153 GP  | HN | GP | HN | HN | HN | GP | GP | GP | HN | GP | GP | HN | GP | HN | GP |
| 113 7H | 144.45 | 8785-443           | 1688 GP | GP | GP | GP | HN | GP | HN | HN | HN | HN | GP | HN | HN | GP | HN | HN |













| F10HGP078 | F10HGP079 | F10HGP080 | F10HGP081 | F10HGP082 | F10HGP083 | F10HGP084 | F10HGP085 | F10HGP086 | F10HGP087 | F10HGP088 | F10HGP089 | F10HGP090 | F10HGP091 | F10HGP092 | F10HGP093 | F10HGP094 | F10HGP095 | F10HGP096 | F10HGP097 | F10HGP098 | F10HGP099 | No. of HN | No. of GP | $\chi^2$ value (1:1) |
|-----------|-----------|-----------|-----------|-----------|-----------|-----------|-----------|-----------|-----------|-----------|-----------|-----------|-----------|-----------|-----------|-----------|-----------|-----------|-----------|-----------|-----------|-----------|-----------|----------------------|
| HN        | GP        | HN        | GP        | HN        | HN        | GP        | HN        | HN        | HN        | HN        | GP        | GP        | GP        | GP        | GP        | HN        | GP        | GP        | GP        | HN        | GP        | 44        | 50        | 0.383                |
| HN        | GP        | HN        | GP        | HN        | HN        | GP        | HN        | HN        | HN        | HN        | GP        | GP        | GP        | GP        | GP        | HN        | GP        | GP        | GP        | HN        | GP        | 43        | 51        | 0.6809               |
| HN        | GP        | HN        | GP        | HN        | GP        | HN        | HN        | HN        | HN        | GP        | GP        | HN        | GP        | GP        | AB        | HN        | HN        | GP        | HN        | HN        | GP        | 50        | 43        | 0.5269               |
| HN        | GP        | HN        | GP        | HN        | GP        | GP        | GP        | HN        | HN        | GP        | GP        | HN        | NC        | GP        | AB        | HN        | HN        | GP        | HN        | HN        | GP        | 48        | 44        | 0.1739               |
| GP        | GP        | HN        | HN        | HN        | GP        | GP        | GP        | HN        | HN        | GP        | GP        | HN        | AB        | GP        | HN        | HN        | HN        | GP        | AB        | HN        | GP        | 52        | 40        | 1.5652               |
| GP        | GP        | HN        | HN        | HN        | GP        | GP        | GP        | HN        | HN        | GP        | GP        | HN        | GP        | GP        | HN        | HN        | HN        | GP        | HN        | HN        | HN        | 55        | 39        | 2.7234               |
| GP        | GP        | HN        | HN        | HN        | GP        | GP        | GP        | HN        | HN        | GP        | GP        | HN        | GP        | GP        | HN        | HN        | HN        | GP        | HN        | HN        | HN        | 55        | 39        | 2.7234               |
| GP        | GP        | HN        | HN        | HN        | GP        | GP        | GP        | HN        | HN        | GP        | GP        | HN        | GP        | GP        | HN        | GP        | HN        | GP        | HN        | HN        | HN        | 51        | 43        | 0.6809               |
| GP        | GP        | HN        | HN        | HN        | GP        | GP        | GP        | HN        | GP        | GP        | GP        | HN        | GP        | GP        | HN        | GP        | HN        | GP        | HN        | HN        | HN        | 48        | 45        | 0.0968               |
| GP        | HN        | HN        | GP        | HN        | GP        | GP        | HN        | HN        | HN        | HN        | GP        | HN        | GP        | HN        | HN        | GP        | GP        | GP        | HN        | GP        | HN        | 46        | 44        | 0.0444               |
| GP        | HN        | HN        | GP        | HN        | GP        | HN        | HN        | GP        | HN        | HN        | GP        | HN        | GP        | HN        | HN        | HN        | HN        | GP        | HN        | HN        | HN        | 51        | 43        | 0.6809               |
| GP        | HN        | HN        | GP        | HN        | GP        | HN        | HN        | GP        | HN        | HN        | GP        | HN        | GP        | HN        | HN        | HN        | GP        | GP        | HN        | HN        | HN        | 51        | 43        | 0.6809               |
| GP        | HN        | HN        | GP        | HN        | GP        | HN        | HN        | GP        | HN        | HN        | GP        | HN        | HN        | HN        | HN        | HN        | GP        | GP        | HN        | HN        | GP        | 51        | 43        | 0.6809               |
| GP        | HN        | HN        | GP        | HN        | GP        | HN        | HN        | GP        | HN        | HN        | GP        | HN        | HN        | HN        | HN        | HN        | GP        | GP        | HN        | HN        | GP        | 55        | 39        | 2.7234               |
| GP        | HN        | HN        | GP        | HN        | GP        | AB        | HN        | GP        | HN        | HN        | HN        | HN        | GP        | HN        | HN        | HN        | GP        | GP        | NC        | HN        | GP        | 54        | 38        | 2.7826               |
| GP        | HN        | HN        | GP        | HN        | GP        | HN        | HN        | GP        | HN        | HN        | HN        | HN        | GP        | HN        | HN        | HN        | GP        | GP        | HN        | HN        | GP        | 54        | 40        | 2.0851               |
| GP        | HN        | HN        | HN        | HN        | GP        | HN        | HN        | GP        | HN        | HN        | HN        | HN        | HN        | HN        | GP        | HN        | GP        | GP        | HN        | HN        | GP        | 56        | 38        | 3.4468               |
| HN        | HN        | HN        | HN        | GP        | GP        | AB        | HN        | HN        | GP        | GP        | GP        | GP        | GP        | HN        | GP        | GP        | HN        | GP        | HN        | GP        | 43        | 49        | 0.3913    |                      |
| HN        | HN        | HN        | HN        | HN        | GP        | HN        | GP        | HN        | GP        | GP        | HN        | HN        | GP        | GP        | HN        | GP        | GP        | HN        | GP        | GP        | HN        | 47        | 47        | 0                    |
| HN        | HN        | HN        | HN        | HN        | GP        | HN        | GP        | HN        | GP        | HN        | HN        | HN        | AB        | GP        | HN        | GP        | AB        | HN        | AB        | GP        | HN        | 47        | 44        | 0.0989               |
| HN        | HN        | HN        | HN        | HN        | GP        | HN        | GP        | HN        | GP        | HN        | HN        | HN        | GP        | GP        | HN        | GP        | HN        | HN        | GP        | HN        | 42        | 52        | 1.0638    |                      |
| HN        | HN        | HN        | HN        | HN        | GP        | HN        | GP        | HN        | GP        | HN        | HN        | HN        | GP        | GP        | HN        | GP        | HN        | HN        | HN        | GP        | HN        | 52        | 42        | 1.0638               |
| HN        | HN        | HN        | HN        | HN        | GP        | HN        | GP        | HN        | GP        | HN        | GP        | HN        | NC        | GP        | HN        | HN        | HN        | HN        | HN        | GP        | HN        | 58        | 35        | 5.6882               |
| HN        | HN        | HN        | HN        | HN        | GP        | HN        | GP        | HN        | GP        | HN        | GP        | HN        | GP        | GP        | HN        | HN        | HN        | HN        | HN        | GP        | HN        | 57        | 37        | 4.2553               |
| HN        | HN        | HN        | HN        | HN        | GP        | HN        | GP        | HN        | GP        | HN        | GP        | HN        | GP        | GP        | HN        | HN        | HN        | HN        | HN        | GP        | HN        | 57        | 37        | 4.2553               |
| HN        | HN        | HN        | HN        | HN        | GP        | HN        | GP        | HN        | GP        | HN        | GP        | HN        | AB        | GP        | HN        | HN        | HN        | HN        | HN        | GP        | HN        | 56        | 37        | 3.8817               |
| HN        | HN        | HN        | HN        | HN        | GP        | HN        | GP        | HN        | GP        | HN        | GP        | HN        | AB        | GP        | HN        | GP        | HN        | HN        | HN        | GP        | HN        | 56        | 36        | 4.3478               |
| HN        | HN        | HN        | HN        | HN        | GP        | HN        | GP        | HN        | GP        | HN        | GP        | HN        | GP        | GP        | HN        | GP        | HN        | HN        | HN        | GP        | HN        | 57        | 37        | 4.2553               |
| HN        | HN        | HN        | HN        | HN        | GP        | HN        | GP        | HN        | GP        | HN        | GP        | HN        | GP        | GP        | HN        | GP        | HN        | HN        | HN        | GP        | HN        | 57        | 37        | 4.2553               |
| HN        | HN        | HN        | HN        | HN        | GP        | AB        | GP        | HN        | GP        | HN        | GP        | HN        | GP        | GP        | HN        | GP        | HN        | HN        | HN        | GP        | HN        | 53        | 40        | 1.8172               |
| HN        | HN        | HN        | HN        | HN        | GP        | HN        | GP        | HN        | GP        | HN        | GP        | HN        | AB        | GP        | HN        | GP        | HN        | HN        | HN        | GP        | HN        | 54        | 39        | 2.4194               |
| HN        | HN        | HN        | HN        | HN        | GP        | HN        | GP        | HN        | GP        | HN        | GP        | HN        | AB        | GP        | HN        | GP        | HN        | HN        | HN        | GP        | HN        | 53        | 39        | 2.1304               |
| HN        | HN        | HN        | HN        | HN        | GP        | HN        | GP        | HN        | GP        | HN        | GP        | HN        | GP        | GP        | HN        | GP        | HN        | HN        | HN        | GP        | HN        | 54        | 40        | 2.0851               |
| HN        | GP        | HN        | HN        | HN        | GP        | HN        | GP        | HN        | GP        | GP        | GP        | HN        | HN        | GP        | HN        | GP        | HN        | HN        | HN        | GP        | GP        | 50        | 44        | 0.383                |
| HN        | GP        | HN        | HN        | HN        | GP        | HN        | GP        | HN        | GP        | HN        | GP        | HN        | GP        | GP        | HN        | GP        | HN        | HN        | HN        | HN        | GP        | 49        | 45        | 0.1702               |
| HN        | GP        | HN        | HN        | HN        | GP        | HN        | HN        | HN        | GP        | HN        | GP        | HN        | GP        | GP        | HN        | GP        | HN        | HN        | HN        | HN        | GP        | 49        | 45        | 0.1702               |
| HN        | GP        | HN        | HN        | GP        | HN        | HN        | HN        | HN        | GP        | GP        | GP        | HN        | GP        | GP        | HN        | HN        | HN        | HN        | HN        | HN        | HN        | 52        | 42        | 1.0638               |
| HN        | GP        | HN        | HN        | GP        | GP        | HN        | GP        | HN        | GP        | GP        | HN        | GP        | HN        | GP        | HN        | HN        | HN        | HN        | HN        | HN        | HN        | 56        | 38        | 3.4468               |
| HN        | GP        | HN        | HN        | GP        | GP        | HN        | GP        | HN        | GP        | GP        | HN        | GP        | HN        | GP        | HN        | HN        | HN        | HN        | HN        | HN        | HN        | 56        | 38        | 3.4468               |
| HN        | GP        | HN        | HN        | GP        | GP        | HN        | GP        | HN        | GP        | HN        | HN        | GP        | HN        | GP        | HN        | HN        | HN        | HN        | HN        | HN        | HN        | 51        | 42        | 0.871                |
| HN        | GP        | HN        | HN        | HN        | GP        | HN        | GP        | HN        | GP        | HN        | HN        | GP        | HN        | GP        | HN        | HN        | HN        | HN        | HN        | HN        | HN        | 49        | 44        | 0.2688               |
| HN        | GP        | HN        | HN        | HN        | GP        | HN        | GP        | HN        | GP        | HN        | HN        | GP        | HN        | GP        | HN        | HN        | HN        | HN        | HN        | HN        | HN        | 46        | 47        | 0.0108               |
| GP        | GP        | GP        | GP        | GP        | HN        | GP        | HN        | GP        | HN        | GP        | GP        | GP        | HN        | GP        | GP        | HN        | GP        | GP        | GP        | GP        | GP        | 38        | 56        | 3.4468               |
| GP        | GP        | GP        | GP        | GP        | HN        | GP        | HN        | GP        | HN        | GP        | GP        | GP        | HN        | GP        | GP        | HN        | GP        | GP        | GP        | GP        | GP        | 38        | 55        | 3.1075               |
| GP        | HN        | HN        | GP        | GP        | GP        | HN        | HN        | GP        | HN        | GP        | GP        | GP        | HN        | GP        | GP        | HN        | HN        | HN        | GP        | HN        | HN        | 53        | 41        | 1.5319               |
| GP        | HN        | HN        | GP        | GP        | GP        | HN        | HN        | GP        | HN        | GP        | GP        | GP        | HN        | GP        | GP        | HN        | HN        | HN        | GP        | HN        | HN        | 55        | 39        | 2.7234               |
| GP        | HN        | HN        | GP        | GP        | GP        | HN        | HN        | GP        | HN        | GP        | GP        | GP        | HN        | GP        | GP        | HN        | HN        | HN        | GP        | HN        | HN        | 55        | 39        | 2.7234               |
| GP        | GP        | HN        | GP        | GP        | GP        | AB        | HN        | GP        | HN        | GP        | GP        | GP        | HN        | GP        | GP        | HN        | HN        | HN        | GP        | HN        | HN        | 54        | 39        | 2.4194               |
| GP        | GP        | HN        | GP        | GP        | GP        | HN        | HN        | GP        | HN        | GP        | GP        | HN        | HN        | GP        | GP        | HN        | HN        | HN        | GP        | HN        | HN        | 54        | 40        | 2.0851               |
| GP        | HN        | HN        | GP        | GP        | GP        | HN        | GP        | HN        | HN        | GP        | GP        | HN        | HN        | GP        | GP        | HN        | HN        | GP        | GP        | GP        | HN        | 55        | 38        | 3.1075               |
| GP        | HN        | HN        | HN        | GP        | HN        | HN        | GP        | GP        | HN        | GP        | HN        | HN        | HN        | GP        | HN        | GP        | HN        | GP        | GP        | GP        | HN        | 60        | 34        | 7.1915               |
| GP        | HN        | HN        | HN        | GP        | HN        | HN        | GP        | GP        | HN        | GP        | HN        | HN        | HN        | GP        | HN        | GP        | HN        | GP        | GP        | GP        | HN        | 59        | 35        | 6.1277               |
| GP        | HN        | HN        | HN        | GP        | HN        | HN        | GP        | GP        | HN        | HN        | HN        | HN        | HN        | GP        | HN        | GP        | HN        | GP        | GP        | GP        | HN        | 57        | 37        | 4.2553               |
| GP        | HN        | HN        | HN        | GP        | HN        | HN        | GP        | HN        | GP        | HN        | HN        | HN        | HN        | GP        | HN        | GP        | HN        | GP        | GP        | GP        | HN        | 52        | 42        | 1.0638               |
| GP        | HN        | HN        | GP        | HN        | HN        | HN        | HN        | HN        | HN        | HN        | HN        | HN        | HN        | GP        | HN        | GP        | HN        | GP        | HN        | GP        | GP        | 50        | 43        | 0.5269               |
| GP        | HN        | HN        | GP        | HN        | HN        | HN        | GP        | HN        | GP        | HN        | HN        | HN        | GP        | GP        | HN        | GP        | HN        | GP        | GP        | GP        | GP        | 47        | 46        | 0.0108               |
| HN        | GP        | HN        | GP        | HN        | HN        | HN        | HN        | GP        | GP        | GP        | GP        | GP        | HN        | GP        | GP        | HN        | GP        | HN        | GP        | GP        | GP        | 44        | 50        | 0.383                |

|    |    |    |    |    |    |    |    |    |    |    |    |    |    |    |    |    |    |    |    |    |    |    |    |        |        |
|----|----|----|----|----|----|----|----|----|----|----|----|----|----|----|----|----|----|----|----|----|----|----|----|--------|--------|
| HN | HN | HN | GP | GP | HN | HN | HN | GP | GP | HN | GP | GP | GP | GP | GP | HN | GP | GP | HN | GP | GP | 49 | 45 | 0.1702 |        |
| HN | HN | HN | HN | HN | GP | HN | HN | HN | GP | HN | GP | GP | GP | GP | GP | GP | GP | GP | GP | HN | HN | 40 | 54 | 2.0851 |        |
| AB | HN | HN | AB | GP | GP | GP | HN | AB | GP | HN | GP | GP | GP | GP | GP | GP | GP | GP | GP | HN | HN | 37 | 53 | 2.8444 |        |
| HN | HN | GP | HN | GP | GP | GP | HN | HN | GP | HN | GP | GP | GP | GP | GP | GP | HN | GP | GP | HN | HN | 41 | 53 | 1.5319 |        |
| HN | HN | GP | HN | GP | GP | GP | GP | HN | GP | HN | GP | GP | GP | GP | GP | GP | HN | GP | GP | HN | HN | 41 | 53 | 1.5319 |        |
| HN | HN | GP | HN | GP | GP | GP | GP | HN | GP | HN | HN | GP | GP | GP | GP | GP | HN | GP | GP | HN | HN | 47 | 47 | 0      |        |
| HN | HN | GP | HN | GP | GP | GP | GP | HN | GP | HN | HN | GP | GP | GP | GP | HN | GP | HN | GP | GP | HN | HN | 49 | 45     | 0.1702 |
| HN | HN | GP | HN | GP | GP | GP | HN | HN | GP | HN | HN | GP | GP | GP | HN | GP | HN | GP | GP | HN | HN | 52 | 42 | 1.0638 |        |
| HN | HN | GP | HN | GP | GP | HN | GP | GP | HN | HN | HN | GP | AB | GP | HN | GP | AB | GP | AB | GP | HN | 45 | 46 | 0.011  |        |

|    |    |    |    |    |    |    |    |    |    |    |    |    |    |    |    |    |    |    |    |    |    |    |    |        |
|----|----|----|----|----|----|----|----|----|----|----|----|----|----|----|----|----|----|----|----|----|----|----|----|--------|
| GP | HN | HN | GP | HN | HN | HN | HN | HN | GP | HN | GP | GP | GP | HN | HN | HN | HN | GP | GP | HN | GP | 50 | 44 | 0.383  |
| GP | HN | GP | GP | HN | GP | HN | HN | HN | HN | HN | GP | HN | HN | GP | HN | HN | GP | GP | GP | HN | GP | 55 | 39 | 2.7234 |
| GP | HN | GP | GP | HN | GP | HN | HN | HN | HN | HN | GP | HN | HN | GP | HN | HN | GP | GP | GP | HN | GP | 54 | 40 | 2.0851 |
| GP | HN | GP | GP | HN | GP | HN | HN | HN | HN | HN | GP | HN | HN | GP | HN | HN | HN | GP | GP | HN | GP | 55 | 39 | 2.7234 |
| GP | HN | GP | GP | HN | GP | HN | HN | HN | HN | HN | HN | HN | HN | GP | HN | HN | HN | GP | HN | HN | GP | 59 | 35 | 6.1277 |
| GP | HN | HN | GP | HN | GP | HN | HN | HN | GP | HN | GP | GP | NC | HN | HN | HN | GP | GP | GP | GP | GP | 45 | 46 | 0.011  |
| GP | HN | GP | GP | GP | HN | HN | HN | GP | GP | HN | HN | GP | HN | HN | HN | HN | GP | GP | HN | GP | GP | 56 | 37 | 3.8817 |
| GP | HN | HN | GP | GP | HN | HN | HN | GP | HN | GP | HN | GP | HN | HN | GP | HN | HN | GP | HN | HN | GP | 57 | 36 | 4.7419 |
| GP | HN | HN | GP | GP | HN | HN | HN | GP | HN | HN | HN | GP | AB | HN | GP | HN | HN | GP | HN | HN | GP | 61 | 31 | 9.7826 |
| GP | HN | HN | GP | GP | GP | HN | HN | GP | HN | HN | HN | GP | NC | HN | GP | HN | NC | GP | AB | HN | GP | 58 | 32 | 7.5111 |
| GP | HN | HN | GP | GP | GP | HN | HN | HN | HN | HN | GP | HN | HN | HN | HN | HN | HN | GP | HN | HN | GP | 54 | 38 | 2.7826 |
| HN | HN | HN | GP | GP | GP | HN | HN | HN | HN | HN | GP | HN | HN | HN | HN | HN | HN | GP | HN | GP | GP | 51 | 43 | 0.6809 |
| HN | HN | HN | GP | GP | GP | GP | HN | HN | HN | HN | GP | HN | HN | HN | HN | HN | HN | GP | HN | GP | GP | 50 | 44 | 0.383  |
| GP | GP | HN | GP | GP | GP | GP | HN | HN | HN | HN | GP | HN | HN | HN | HN | HN | NC | GP | NC | GP | GP | 52 | 40 | 1.5652 |
| GP | GP | GP | HN | GP | HN | GP | HN | HN | HN | GP | GP | GP | GP | GP | GP | GP | GP | GP | HN | GP | GP | 47 | 47 | 0      |
| GP | GP | GP | HN | GP | HN | HN | HN | HN | HN | GP | GP | GP | GP | GP | GP | GP | GP | HN | HN | GP | GP | 48 | 46 | 0.0426 |

|    |    |    |    |    |    |    |    |    |    |    |    |    |    |    |    |    |    |    |    |    |    |    |    |        |
|----|----|----|----|----|----|----|----|----|----|----|----|----|----|----|----|----|----|----|----|----|----|----|----|--------|
| HN | GP | HN | HN | HN | GP | HN | GP | GP | HN | GP | GP | HN | HN | GP | HN | HN | GP | HN | GP | HN | HN | 44 | 50 | 0.383  |
| HN | GP | HN | HN | HN | GP | HN | GP | GP | HN | GP | GP | HN | HN | GP | HN | HN | GP | HN | GP | HN | HN | 45 | 49 | 0.1702 |
| HN | GP | HN | HN | HN | GP | HN | GP | GP | GP | GP | GP | HN | HN | GP | HN | HN | GP | HN | GP | HN | HN | 44 | 50 | 0.383  |
| HN | GP | HN | HN | HN | GP | HN | GP | GP | HN | GP | HN | HN | GP | HN | HN | GP | HN | HN | GP | HN | HN | 42 | 52 | 1.0638 |
| HN | GP | HN | HN | HN | GP | HN | GP | GP | HN | GP | HN | HN | NC | GP | HN | HN | HN | GP | HN | HN | GP | 47 | 46 | 0.0108 |
| GP | HN | HN | GP | HN | GP | HN | GP | GP | HN | GP | GP | HN | HN | GP | HN | HN | HN | HN | HN | HN | HN | 52 | 42 | 1.0638 |
| GP | HN | HN | GP | HN | GP | HN | GP | GP | HN | GP | GP | HN | NC | HN | HN | HN | AB | HN | HN | HN | HN | 45 | 46 | 0.011  |
| GP | GP | HN | GP | HN | HN | GP | GP | HN | HN | GP | GP | HN | HN | GP | HN | HN | GP | HN | HN | GP | HN | 45 | 49 | 0.1702 |
| GP | GP | HN | GP | HN | HN | GP | GP | HN | HN | GP | GP | HN | HN | GP | HN | HN | GP | HN | HN | GP | HN | 44 | 50 | 0.383  |
| GP | GP | HN | GP | AB | HN | GP | GP | HN | HN | GP | GP | HN | HN | GP | HN | HN | GP | HN | HN | GP | HN | 43 | 50 | 0.5269 |
| GP | GP | HN | GP | HN | HN | GP | GP | HN | HN | GP | GP | HN | HN | GP | HN | HN | HN | HN | HN | GP | HN | 44 | 50 | 0.383  |
| GP | GP | HN | GP | HN | HN | GP | GP | HN | HN | GP | GP | HN | HN | GP | HN | HN | HN | HN | HN | GP | HN | 44 | 50 | 0.383  |
| GP | GP | HN | GP | HN | HN | GP | GP | HN | HN | GP | GP | HN | HN | GP | HN | HN | HN | HN | HN | GP | HN | 44 | 50 | 0.383  |
| GP | GP | HN | GP | HN | HN | GP | GP | HN | HN | GP | GP | HN | HN | GP | HN | HN | HN | HN | HN | GP | HN | 46 | 48 | 0.0426 |
| GP | GP | HN | GP | HN | HN | GP | GP | HN | HN | GP | GP | HN | HN | GP | HN | HN | HN | HN | HN | GP | HN | 45 | 49 | 0.1702 |
| GP | GP | HN | GP | HN | HN | GP | GP | HN | HN | GP | GP | HN | HN | GP | GP | HN | HN | HN | HN | GP | HN | 44 | 50 | 0.383  |
| HN | GP | GP | GP | HN | HN | GP | HN | HN | HN | GP | GP | GP | HN | HN | GP | HN | HN | HN | HN | GP | GP | 50 | 44 | 0.383  |
| HN | GP | GP | GP | HN | HN | GP | HN | HN | HN | GP | GP | HN | HN | GP | GP | HN | HN | HN | HN | GP | GP | 49 | 45 | 0.1702 |
| GP | GP | HN | HN | GP | HN | GP | HN | GP | GP | GP | HN | GP | GP | GP | GP | HN | HN | GP | HN | HN | 47 | 47 | 0  |        |
| GP | GP | GP | HN | GP | HN | HN | HN | GP | GP | GP | HN | GP | NC | GP | GP | GP | HN | HN | HN | HN | HN | 51 | 42 | 0.871  |
| GP | GP | GP | GP | GP | HN | HN | HN | GP | HN | GP | GP | GP | HN | GP | GP | GP | HN | HN | HN | HN | HN | 47 | 47 | 0      |

|    |    |    |    |    |    |    |    |    |    |    |    |    |    |    |    |    |    |    |    |    |    |    |        |        |
|----|----|----|----|----|----|----|----|----|----|----|----|----|----|----|----|----|----|----|----|----|----|----|--------|--------|
| HN | HN | HN | GP | HN | GP | HN | GP | HN | GP | HN | GP | GP | GP | HN | GP | HN | GP | GP | HN | GP | HN | 48 | 46     | 0.0426 |
| HN | HN | HN | NC | HN | NC | HN | NC | HN | GP | HN | GP | HN | GP | GP | GP | HN | GP | GP | HN | GP | HN | 48 | 38     | 1.1628 |
| HN | HN | HN | GP | HN | GP | HN | GP | HN | GP | GP | HN | HN | GP | GP | HN | GP | GP | GP | AB | GP | HN | 48 | 45     | 0.0968 |
| HN | HN | HN | GP | HN | HN | GP | HN | HN | HN | GP | HN | HN | AB | HN | HN | HN | NC | GP | HN | GP | HN | 54 | 38     | 2.7826 |
| HN | GP | HN | GP | HN | HN | GP | HN | HN | HN | GP | HN | HN | GP | HN | HN | HN | HN | GP | HN | GP | HN | 55 | 39     | 2.7234 |
| HN | GP | HN | GP | GP | HN | GP | HN | GP | HN | HN | GP | GP | HN | HN | HN | GP | GP | GP | HN | HN | 47 | 47 | 0      |        |
| AB | GP | AB | GP | GP | HN | GP | HN | GP | HN | GP | HN | HN | GP | GP | HN | HN | HN | HN | GP | HN | HN | 45 | 47     | 0.0435 |
| AB | GP | AB | HN | GP | HN | GP | HN | GP | HN | HN | GP | GP | HN | HN | HN | HN | HN | GP | HN | HN | 46 | 46 | 0      |        |
| HN | GP | HN | HN | GP | HN | GP | HN | GP | HN | HN | GP | GP | HN | HN | HN | HN | HN | GP | HN | HN | 47 | 47 | 0      |        |
| HN | GP | GP | HN | GP | HN | GP | HN | GP | HN | HN | GP | HN | HN | GP | HN | HN | HN | HN | GP | HN | HN | 47 | 47     | 0      |
| HN | GP | GP | HN | GP | HN | GP | HN | GP | HN | HN | GP | HN | HN | AB | GP | HN | HN | HN | HN | GP | HN | 46 | 47     | 0.0108 |
| HN | GP | GP | HN | GP | HN | GP | HN | GP | HN | HN | GP | GP | HN | HN | HN | HN | HN | GP | HN | HN | 46 | 48 | 0.0426 |        |
| HN | GP | GP | HN | GP | HN | GP | HN | GP | HN | HN | GP | GP | HN | HN | HN | HN | HN | GP | HN | HN | 47 | 47 | 0      |        |
| HN | GP | GP | HN | GP | HN | GP | HN | GP | HN | HN | GP | GP | HN | HN | HN | HN | HN | GP | HN | HN | 48 | 46 | 0.0426 |        |
| GP | HN | GP | HN | GP | HN | GP | HN | GP | HN | GP | GP | HN | GP | GP | HN | HN | AB | GP | NC | HN | HN | 47 | 45     | 0.0435 |
| GP | HN | GP | HN | GP | HN | HN | HN | HN | HN | GP | HN | GP | GP | GP | HN | HN | HN | GP | GP | HN | HN | 53 | 41     | 1.5319 |
| HN | HN | GP | GP | HN | HN | GP | HN | HN | GP | GP | HN | GP | GP | GP | GP | HN | GP | GP | GP | HN | HN | 41 | 53     | 1.5319 |
| HN | HN | GP | GP | HN | HN | GP | GP | HN | HN | GP | GP | GP | GP | GP | GP | GP | GP | GP | GP | GP | HN | 41 | 53     | 1.5319 |
| GP | HN | HN | GP | HN | HN | HN | HN | HN | GP | AB | GP | GP | GP | HN | HN | HN | HN | GP | GP | HN | GP | 48 | 45     | 0.0968 |

Table S3. Analysis of the allelic interactions in *TFA4*, *TFA7* and *TFA9* in transgenic HN×GP plants.

| Loci                | Genotype |          |          | $\chi^2$ | df | (ratio) | $\chi^2$ | df | (ratio)            | $\chi^2$ | df | (ratio)            |
|---------------------|----------|----------|----------|----------|----|---------|----------|----|--------------------|----------|----|--------------------|
|                     | GP       | HE       | HN       |          |    |         |          |    |                    |          |    |                    |
| <i>TFA4</i>         | 10       | 27       | 23       | 6.23 *   | 2  | (1:2:1) | 5.69 *   | 1  | (3:1=[GP+HE]:[HN]) | 2.22     | 1  | (1:3=[GP]:[HE+HN]) |
| <i>TFA7</i>         | 8        | 35       | 17       | 4.37     | 2  | (1:2:1) | 0.36     | 1  | (3:1=[GP+HE]:[HN]) | 4.36 *   | 1  | (1:3=[GP]:[HE+HN]) |
| <i>TFA9</i>         | 12       | 26       | 22       | 4.40     | 2  | (1:2:1) | 4.36 *   | 1  | (3:1=[GP+HE]:[HN]) | 0.80     | 1  | (1:3=[GP]:[HE+HN]) |
|                     | GP/GP    | HE/HE    | HN/HN    |          |    |         |          |    |                    |          |    |                    |
| <i>TFA4&amp;7</i>   | 1        | 15       | 5        | 2.43     | 2  | (1:4:1) |          |    |                    |          |    |                    |
| <i>TFA4&amp;9</i>   | 3        | 11       | 9        | 8.57 *   | 2  | (1:4:1) |          |    |                    |          |    |                    |
| <i>TFA7&amp;9</i>   | 3        | 14       | 6        | 1.57     | 2  | (1:4:1) |          |    |                    |          |    |                    |
|                     | GP/GP/GP | HE/HE/HE | HN/HN/HN |          |    |         |          |    |                    |          |    |                    |
| <i>TFA4,7&amp;9</i> | 0        | 6        | 3        | 5.78     | 2  | (1:8:1) |          |    |                    |          |    |                    |

\*:Statistically significant by Chi-square test (p<0.05)
